1        **AAV-Txnip prolongs cone survival and vision in mouse models of retinitis pigmentosa**

2  
3        Yunlu Xue<sup>1,2</sup>, Sean K. Wang<sup>1,2,3</sup>, Parimal Rana<sup>1</sup>, Emma R. West<sup>1,3</sup>, Christin M. Hong<sup>1,3</sup>, Helian  
4        Feng<sup>4</sup>, David M. Wu<sup>1,2,5</sup>, Constance L. Cepko<sup>1,2,3\*</sup>

5  
6        <sup>1</sup> Department of Genetics, Blavatnik Institute, Harvard Medical School, Boston, MA, USA 02115

7        <sup>2</sup> Department of Ophthalmology, Harvard Medical School, Boston, MA, USA 02115

8        <sup>3</sup> Howard Hughes Medical Institute, Chevy Chase, MD, USA 20815

9        <sup>4</sup> Department of Biostatistics, Harvard T.H. Chan School of Public Health, Boston, MA, USA 02115

10       <sup>5</sup> Retina Service, Massachusetts Eye and Ear Infirmary, Harvard Medical School, Boston, MA,  
11       USA 02114

12  
13       \* email: [cepko@genetics.med.harvard.edu](mailto:cepko@genetics.med.harvard.edu)

14

## 15 **Abstract**

16 Retinitis pigmentosa (RP) is an inherited retinal disease, affecting >20 million people worldwide.  
17 Loss of daylight vision typically occurs due to the dysfunction/loss of cone photoreceptors, the cell  
18 type that initiates our color and high acuity vision. Currently, there is no effective treatment for RP,  
19 other than gene therapy for a limited number of specific disease genes. To develop a gene-  
20 agnostic therapy, we screened  $\approx 20$  genes for their ability to prolong cone photoreceptor survival *in*  
21 *vivo*. Here, we report an adeno-associated virus (AAV) vector expressing Txnip, which prolongs  
22 the survival of cone photoreceptors and improves visual acuity in RP mouse models. A Txnip  
23 allele, C247S, which blocks the association of Txnip with thioredoxin, provides an even greater  
24 benefit. Additionally, the rescue effect of Txnip depends on lactate dehydrogenase b (Ldhb), and  
25 correlates with the presence of healthier mitochondria, suggesting that Txnip saves RP cones by  
26 enhancing their lactate catabolism.

27  
28  
29  
30  
31  
32

## 33 **Introduction**

34 Retinitis pigmentosa (RP) is one of the most prevalent types of inherited retinal diseases, affecting  
35 approximately one in 3,000 people (Hartong et al., 2006). In RP, the rod photoreceptors, which  
36 initiate night vision, are primarily affected by the disease genes, and degenerate first. The  
37 degeneration of cones, the photoreceptors that initiate daylight, color and high acuity vision, then  
38 follows, which greatly impacts the quality of life. Currently, one therapy that holds great promise for  
39 RP is gene therapy using AAV (Maguire et al., 2019). This approach has proven successful for a  
40 small number of genes affecting a few disease families (Cehajic-Kapetanovic et al., 2020).  
41 However, due to the number and functional heterogeneity of RP disease genes ( $\approx 100$  genes that  
42 primarily affect rods (<https://sph.uth.edu/retnet/>), gene therapy for each RP gene will be logistically  
43 and financially difficult. In addition, a considerable number of RP patients do not have an identified  
44 disease gene. A disease gene-agnostic treatment aimed at prolonging cone function/survival in the  
45 majority of RP patients could thus benefit many more patients. Given that the disease gene is  
46 typically not expressed in cones, and thus their death is due to non-autonomous mechanisms that  
47 may be in common across disease families, answers to the question of why cones die may provide  
48 an avenue to a widely applicable therapy for RP. To date, the suggested mechanisms of cone  
49 death include oxidative damage (Komeima et al., 2006; Wellard et al., 2005; Xiong et al., 2015),  
50 inflammation (Wang et al., 2020, 2019; Zhao et al., 2015), and a shortage of nutrients (Ait-Ali et  
51 al., 2015; Kanow et al., 2017; Punzo et al., 2012, 2009; Wang et al., 2016).

52  
53 In 2009, we surveyed gene expression changes that occurred during retinal degeneration in four  
54 mouse models of RP (Punzo et al., 2009). Those data led us to suggest a model wherein cones  
55 starve and die due to a shortage of glucose, which is typically used for energy and anabolic needs  
56 in photoreceptors via glycolysis. Evidence of this “glucose shortage hypothesis” was subsequently  
57 provided by orthogonal approaches from other groups (Ait-Ali et al., 2015; Wang et al., 2016).  
58 These studies have inspired us to test  $\approx 20$  genes that might affect the uptake and/or utilization of  
59 glucose by cones *in vivo* in three mouse models of RP (Supplementary Table 1). Only one gene,  
60 *txnip*, had a beneficial effect, prolonging cone survival and visual acuity in these models. *Txnip*  
61 encodes an  $\alpha$ -arrestin family member protein with multiple functions, including binding to  
62 thioredoxin (Junn et al., 2000; Nishiyama et al., 1999), facilitating removal of the glucose  
63 transporter 1 (Glut1), from the cell membrane (Wu et al., 2013), and promoting the use of non-  
64 glucose fuels (DeBalsi et al., 2014). Because  $\alpha$ -arrestins are structurally distinct from the visual or  
65  $\beta$ -arrestins such as Arr3, Txnip is unlikely to bind to opsins or to participate in phototransduction  
66 (Hwang et al., 2014; Kang et al., 2015; Puca and Brou, 2014). We tested a number of *txnip* alleles

67 and found that one allele, C247S, which blocks the association of Txnip with thioredoxin (Patwari  
68 et al., 2009), provided the greatest benefit. Investigation of the mechanism of Txnip rescue  
69 revealed that it required lactate dehydrogenase b (Ldhd), which catalyzes the conversion of lactate  
70 to pyruvate. Imaging of metabolic reporters demonstrated an enhanced cytosolic ATP:ADP ratio  
71 when the retina was placed in lactate medium. Moreover, mitochondria appeared to be healthier  
72 as a result of Txnip addition, but this improvement was not sufficient for cone rescue.

73  
74 The above observations led to a model wherein Txnip shifts cones from their normal reliance on  
75 glucose to enhanced utilization of lactate, as well as marked improvement in mitochondrial  
76 structure and function. Analysis of the rescue activity of several additional genes predicted to  
77 affect glycolysis, provided support for this model. Finally, as our goal is to rescue cones that suffer  
78 not only from metabolic challenges, but also from inflammation and oxidative damage, we tested  
79 Txnip in combination with anti-inflammatory and anti-oxidative damage genes, and found additive  
80 benefits for cones. These treatments may benefit cones not only in RP, but also in other ocular  
81 diseases where similar environmental stresses are present, such as in age related macular  
82 degeneration (AMD).

83  
84

## 85 Results

86

87 **Txnip prolongs RP cone survival and visual acuity.** We delivered genes that might address a  
88 glucose shortage and/or mismanagement of metabolism in a potentially glucose-limited  
89 environment. To this end, twelve AAV vectors were constructed to test genes singly or in  
90 combination for an initial screen (Extended Data Fig. 1e). Subsequently, an additional set of AAV  
91 vectors were made based upon the initial screen results, as well as other rationales, to total 20  
92 genes tested in all (Supplementary Table 1). Most of these vectors carried genes to augment the  
93 utilization of glucose, such as hexokinases (Hk1 and Hk2), phosphofructokinase (Pfk1 and Pfk2) and  
94 pyruvate kinase (Pkm1 and Pkm2). Each AAV vector used a cone-specific promoter, which was  
95 previously found to be non-toxic at the doses used in this study (Xiong et al., 2019). An initial  
96 screen was carried out in *rd1* mice, which harbor a null allele in the rod-specific gene, *Pde6b*. This  
97 strain has a rapid loss of rods, followed by cone death. The vectors were subretinally injected into  
98 the eyes of neonatal *rd1* mice, in combination with a vector using the human red opsin (RedO)  
99 promoter to express a histone 2B-GFP fusion protein (AAV-RedO-H2BGFP). The H2BGFP  
100 provides a very bright cone-specific nuclear labelling, enabling automated quantification. As a  
101 control, eyes were injected with AAV-RedO-H2BGFP alone. *Rd1* cones begin to die at  $\approx$ postnatal  
102 day 20 (P20), when almost all rods have died (Extended Data Fig. 1a). The number of *rd1* cones  
103 was quantified by counting the H2BGFP<sup>+</sup> cells using a custom-made MATLAB program (Fig. 1a  
104 and Extended Data Fig. 1c). Only cones within the central region of the retina were counted, since  
105 RP cones in the periphery die much later (Hartong et al., 2006; Punzo et al., 2009). Among the  
106 twelve tested vectors, and six of their combinations, we found that only Txnip led to an increase in  
107 P50 *rd1* cones. The effects were likely on cone survival, as it did not change the number of cones  
108 at P20 prior to their death (Fig. 1a,b, and Extended Data Fig. 1c,e). The level of Txnip rescue in  
109 P50 *rd1* cones was comparable to using AAV with a CMV promoter to express a transcription  
110 factor, Nrf2, that regulates anti-oxidation pathways and reduces inflammation as we found  
111 previously (Xiong et al., 2015) (Extended Data Fig. 1e). One combination led to a reduction in  
112 cone survival, that of Hk1 plus Pfk1 (Extended Data Fig. 1e).

113

114 Our initial screen used the RedO promoter to drive Txnip expression. To evaluate a different cone-  
115 specific promoter, Txnip also was tested using a newly described cone-specific promoter, SynPVI  
116 (Jüttner et al., 2019). This promoter also led to prolonged cone survival (Extended Data Fig. 1e).  
117 To explore whether Txnip gene therapy is effective beyond *rd1*, it was tested in *rd10* mice, which  
118 carry a missense *Pde6b* mutation, and in *rho*<sup>-/-</sup> mice, which carry a null allele in a rod-specific

119 protein, rhodopsin. Prolonged cone survival was observed in both strains (Fig. 1a,b). To determine  
120 if Txnip-treated mice sustained greater visual acuity than control RP mice, an optomotor assay  
121 was used (Prusky et al., 2004). Under conditions that simulated daylight, Txnip treated eyes  
122 showed enhanced visual acuity compared to the control contralateral eyes in *rd10* and *rho*<sup>-/-</sup> mice  
123 (Fig. 1c). Txnip also was evaluated for effects on cones in wildtype (wt) mice, using PNA staining,  
124 which stains the cone-specific extracellular matrix and reflects cone health. The approximate  
125 number and morphology of Txnip-treated cones appeared normal by this assay (Extended Data  
126 Fig. 1d).

127

**Evaluation of *txnip* alleles for cone survival.** Previous studies of Txnip provided a number of  
128 alleles that could potentially lead to a more effective cone rescue by Txnip, and/or provide some  
129 insight into which of the Txnip functions are required for enhancing cone survival. A C247S  
130 mutation has been shown to block Txnip's inhibitory interaction with thioredoxin (Patwari et al.,  
131 2009), which is an important component of a cell's ability to fight oxidative damage via thiol groups  
132 (Junn et al., 2000; Nishinaka et al., 2001; Nishiyama et al., 1999). If cone rescue by Txnip required  
133 this function, the C247S allele should be less potent for cone rescue. Alternatively, if loss of  
134 thioredoxin binding freed Txnip for its other functions, and made more thioredoxin available for  
135 oxidative damage control, this allele might more effectively promote cone survival. The C247S  
136 clearly provided more robust cone rescue than wildtype (wt) Txnip in all three RP mouse strains  
137 (Fig. 2a,b and Extended Data Fig. 2a,b). These results indicate that the therapeutic effect of Txnip  
138 is not based on the inhibitory interaction with thioredoxins. This finding is in keeping with previous  
139 work which showed that anti-oxidation strategies promoted cone survival in RP mice (Komeima et  
140 al., 2006; Wu et al., n.d.; Xiong et al., 2015). An additional mutant, S308A, which loses an  
141 AMPK/Akt-phosphorylation site on Txnip (Waldhart et al., 2017; Wu et al., 2013), was tested in the  
142 context of wt Txnip and in the context of the C247S allele. The S308A allele did not benefit cone  
143 survival in either context (Fig. 2a,b). In addition, the S308A allele was assayed for negative effects  
144 on cones by an assessment of *rd1* cone number prior to P20, i.e. before the onset of cone death  
145 (Extended Data Fig. 2c). It did not reduce the cone number at this early timepoint, indicating that  
146 Txnip.S308A was not toxic to cones. This finding suggests that the S308 residue is critical for the  
147 therapeutic function of Txnip, through an unclear mechanism. One additional allele,  
148 LL351&352AA, was tested in the context of C247S. This allele eliminates a clathrin-binding site,  
149 and thus hampers Txnip's ability to remove Glut1 from cell surface through clathrin-coated pits  
150 (Wu et al., 2013). Txnip.C247S.LL351&352AA could still delay RP cone death compared to the  
151 control (Fig. 2b), suggesting that the therapeutic effect of Txnip was unlikely to be only through the  
152 removal of Glut1 from the cell surface. To further explore the role of Glut1, an shRNA to *slc2a1*,  
153 which encodes Glut1, was tested. It did not prolong RP cone survival (Extended Data Fig. 2d). The  
154 slight decrease of Txnip.C247S.LL351&352AA in cone rescue compared to Txnip.C247S might be  
155 due to other, currently unknown effects of LL351&352, or a less specific effect, e.g. a protein  
156 conformational change.

157

**Txnip requires lactate dehydrogenase b (Ldhb) to prolong cone survival.** Human carrying  
158 Txnip null mutant presents lactic acidosis (Katsu-Jiménez et al., 2019), suggesting Txnip  
159 deficiency compromises lactate catabolism. A recent metabolomic study of muscle using a  
160 targeted knock-out of Txnip suggested that Txnip increases the catabolism of non-glucose fuels,  
161 such as lactate, ketone bodies and lipids (DeBalsi et al., 2014). This switch in fuel preference was  
162 proposed to benefit the mitochondrial tricarboxylic acid cycle (TCA) cycle, leading to a greater  
163 production of ATP. As presented earlier, a problem for cones in the RP environment might be a  
164 shortage of glucose (Ait-Ali et al., 2015; Punzo et al., 2009; Wang et al., 2016). A benefit of Txnip  
165 might then be to enable and/or force cells to switch from a preference for glucose to one or more  
166 alternative fuels. To test this hypothesis, we co-injected AAV-Txnip with shRNAs targeting the  
167 rate-limiting genes for the catalysis of lactate, ketones or lipids. Ldhb, encoded by *ldhb* gene, is the  
168 enzyme that converts lactate to pyruvate to potentially fuel the TCA cycle, and lactate  
169  
170



171 dehydrogenase a (Ldha, encoded by *ldha* gene), converts pyruvate to lactate (Eventoff et al.,  
172 1977). We found that Txnip rescue was significantly decreased by any one of three Ldhb shRNAs  
173 (siLdhb) or by overexpression of Ldha (Fig. 3a,b and Extended Data Fig. 3). We also tested the  
174 rescue effect of Txnip plus an shRNA against Oxct1 (siOxct1), a critical enzyme for ketolysis  
175 (Zhang and Xie, 2017), or against Cpt1a (siCpt1a), a component for lipid transporter that is rate  
176 limiting for  $\beta$ -oxidation (Shriver and Manchester, 2011). These shRNAs, tested singly or in  
177 combination, did not reduce the effectiveness of Txnip rescue (Fig. 3c). Taken together, these data  
178 support the use of lactate, but not ketones or lipids, as a critical alternative fuel for cones when  
179 Txnip is overexpressed.

180  
181 **Txnip improves the ATP:ADP ratio in RP cones in the presence of lactate.** If the improved  
182 survival of cones following Txnip overexpression is due to improved utilization of non-glucose  
183 fuels, cones might show improved mitochondrial metabolism. To begin to examine the metabolism  
184 of cones, we first attempted to perform metabolomics of cones with and without Txnip. However,  
185 so few cones are present in these retinas that we were unable to achieve meaningful results. An  
186 alternative assay was conducted to measure the ratio of ATP to ADP using a genetically-encoded  
187 fluorescent sensor (GEFS). AAV was used to deliver PercevalHR, an ATP:ADP GEFS (Tantama  
188 et al., 2013), to *rd1* cones with and without AAV-Txnip. The infected P20 *rd1* retinas were  
189 explanted and imaged in three different types of media to measure the cone cytosolic ratio of  
190 ATP:ADP. Txnip increased the ATP:ADP ratio (i.e. higher  $F_{\text{PercevalHR}}^{488:405}$ ) of *rd1* cones in lactate-  
191 only or pyruvate-only media. Consistent with the role of Txnip in removing Glut1 from the plasma  
192 membrane, Txnip treated cones had a lower ATP:ADP ratio (i.e. lower  $F_{\text{PercevalHR}}^{488:405}$ ) in high  
193 glucose medium (Fig. 4a,b). To further probe whether intracellular glucose was reduced after  
194 overexpression of Txnip (Wu et al., 2013), a glucose sensor iGlucoSnFR was used (Keller et al.,  
195 2019). This sensor showed reduced intracellular glucose in Txnip-treated cones (Extended Data  
196 Fig. 4a,b). Because the fluorescence of GEFS may be also subject to environmental pH, we used  
197 a pH sensor, pHRed (Tantama et al., 2011), to determine if the changes of PercevalHR and  
198 iGlucoSnFR were due to a change in pH, and it showed no significant pH change (Extended  
199 Data Fig. 4c,d). We also found that lactate, but not pyruvate, utilization by Txnip-treated cones was  
200 critically dependent upon Ldhb for ATP production, as introduction of siLdhb abrogated the  
201 increase in ATP:ADP in Txnip-treated cones (Fig. 4c). Furthermore, in correlation with improved  
202 cone survival by Txnip.C247S compared to wt Txnip (Fig. 2b), cones had a higher ATP:ADP ratio  
203 in lactate medium when Txnip.C247S was used relative to wt Txnip (Fig. 4e). Similarly, in  
204 correlation with no survival benefit when treated with Txnip.S308A (Fig. 2b), there was no  
205 difference in the ATP:ADP ratio when Txnip.S308A was used, relative to control, in lactate medium  
206 (Fig. 4e).

207  
208 **Txnip improved RP cone mitochondrial gene expression, size, and function.** To further probe  
209 the mechanism(s) of Txnip rescue, we first tested if all of the benefits of Txnip were due to Txnip's  
210 effects on Ldhb. Ldhb was thus overexpressed alone or with Txnip. Ldhb alone did not prolong  
211 cone survival, nor did it increase the Txnip rescue (Extended Data Fig. 6e). An additional  
212 experiment was carried out to investigate if there might be a shortage of the mitochondrial  
213 pyruvate carrier, which could limit the uptake of pyruvate into the mitochondria of photoreceptors  
214 for ATP synthesis (Grenell et al., 2019). The pyruvate carrier, which is a dimer encoded by *mpc1*  
215 and *mpc2* genes, thus was overexpressed, but did not prolong *rd1* cone survival (Extended Data  
216 Fig. 6c). To take a less biased approach, the transcriptomic differences between Txnip-treated and  
217 control RP cones were characterized. H2BGFP labeled RP cones were isolated by FACS-sorting  
218 at an age when cones were beginning to die, and RNA-sequencing was performed (Extended  
219 Data Fig. 5a). Data were obtained from two RP strains, *rd1* and *rho*<sup>-/-</sup>. By comparing the  
220 differentially expressed genes in common between the two strains, relative to control, seven genes  
221 were seen to be upregulated and 17 were downregulated (Supplementary Table 2). Three of the  
222 seven upregulated genes were mitochondrial electron transport chain (ETC) genes. The

223 upregulation of these three ETC genes in Txnip-treated *rd1* cones was confirmed by ddPCR  
224 (Extended Data Fig. 5b).

225  
226 The finding of upregulated ETC genes in Txnip-treated cones suggested effects on mitochondria,  
227 and thus the morphology of Txnip-treated mitochondria in RP cones was examined by electron  
228 microscopy (EM). There was an increase in mitochondrial size by Txnip treatment, with a greater  
229 increase in size following treatment with Txnip.C247S (Fig. 5a,b). Mitochondrial membrane  
230 potential ( $\Delta\Psi_m$ ) activity, a reflection of mitochondrial ETC function, was also examined using JC-1  
231 dye staining of freshly explanted Txnip-treated P20 *rd1* retinas (Reers et al., 1995). Both Txnip and  
232 Txnip.C247S increased the ratio of J-aggregates:JC1-monomers (Fig. 5c,d), indicating an  
233 increased  $\Delta\Psi_m$  and/or a greater number/size of mitochondria with a high  $\Delta\Psi_m$  following Txnip  
234 overexpression. This finding was further investigated *in vivo* using infection by an AAV encoding  
235 mitoRFP, which only accumulates in mitochondria with a high  $\Delta\Psi_m$  (Brodier et al., 2020; Hood et  
236 al., 2003). Compared to the control cones without Txnip treatment, the intensity of mitoRFP was  
237 higher in P20 *rd1* cones treated with Txnip (Extended Data Fig. 5c,d).

238  
239 A previous study identified 15 proteins that interact with Txnip.C247S (Forred et al., 2016). Among  
240 these interactors was Parp1, which can negatively affect mitochondria through deleterious effects  
241 on the mitochondrial genome (Hocsak et al., 2017; Szczesny et al., 2014), as well as have effects  
242 on inflammation and other cellular pathways (Fehr et al., 2020). Due to the similarities between the  
243 effects of Txnip addition and of Parp1 inhibition on mitochondria, Parp1 was tested for a potential  
244 role in Txnip-mediated rescue. Parp1 expression was first examined by immunohistochemistry and  
245 found to be enriched in cone inner segments, which are packed with mitochondria (Hoang et al.,  
246 2002), and in cone nuclei (Extended Data Fig. 5g). Interestingly, these are the same locations  
247 where a GFP-Txnip fusion protein was found (Extended Data Fig. 1b). To test for a role of Parp1,  
248 *parp1*<sup>-/-</sup> mice were bred to *rd1* mice, and their cone mitochondria were examined by EM and  
249 mitoRFP. *Parp1*<sup>-/-</sup> *rd1* cones possessed larger mitochondria (Extended Data Fig. 5h,i) and higher  
250 mitoRFP signals than cones from *parp1*<sup>+/+</sup> *rd1* controls. Addition of Txnip.C247S to *parp1*<sup>-/-</sup> *rd1*  
251 cones did not alter the mitoRFP signals (Fig. 5e,f). However, when Txnip.C247S was added to  
252 *parp1*<sup>-/-</sup> *rd1* retinas, cone survival was similar to that of Txnip.C247S-treated *parp1*<sup>+/+</sup> *rd1* retinas,  
253 showing that Txnip-mediated survival does not require Parp1 (Fig. 5g,h).

254  
255 The discordance between improved mitochondria and cone survival in these experiments  
256 suggested that mitochondrial improvement alone is not sufficient to prolong cone survival. This is  
257 consistent with the observations from treatment with Txnip.S308A, as well as Txnip + siLdhd, both  
258 of which failed to prolong *rd1* cone survival despite improvements in mitochondria (Fig.  
259 2a,b,5a,b,c,d, and Extended Data Fig. 5c,d,e,f). To test if improved cone survival requires both  
260 mitochondrial improvement and enhanced lactate catabolism, we delivered Ldhd to *parp1*<sup>-/-</sup> *rd1*  
261 cones. A small but significant improvement in cone survival was observed (Fig. 5i,j).

262  
263 **Txnip enhances Na<sup>+</sup>/K<sup>+</sup> pump function and cone opsin expression.** The results above suggest  
264 that Txnip may prolong RP cone survival by enhancing lactate catabolism via Ldhd, which may  
265 lead to greater ATP production by the oxidative phosphorylation (OXPHOS) pathway. Cone  
266 photoreceptors are known to require high levels of ATP to maintain their membrane potential,  
267 relying primarily upon the Na<sup>+</sup>/K<sup>+</sup> ATPase pump (Ingram et al., 2020). To investigate whether  
268 Txnip affects the function of the Na<sup>+</sup>/K<sup>+</sup> pump in RP cones, freshly explanted P20 *rd1* retinas were  
269 treated with RH421, a fluorescent small-molecule probe for Na<sup>+</sup>/K<sup>+</sup> pump function (Fedosova et al.,  
270 1995). Addition of Txnip improved Na<sup>+</sup>/K<sup>+</sup> pump function of these cones in lactate medium as  
271 reflected by an increase in RH421 fluorescence (Fig. 6a,b), consistent with Txnip enabling greater  
272 utilization of lactate. In RP cones, it is also known that protein expression of cone opsin is down-  
273 regulated, postulated to be due to insufficient energy supply (Punzo et al., 2009). Compared to

274 control, greater anti-opsin staining was observed in Txnip-treated *rd1* cones at P50 (Fig. 6c),  
275 further supporting the idea that Txnip improves the energy supply to RP cones.

276  
277 **Dominant-negative HIF1 $\alpha$  improves RP cone survival.** If improved lactate catabolism and  
278 OXPHOS are at least part of the mechanism of Txnip rescue, RP cone survival might be promoted  
279 by other molecules serving similar functions. HIF1 $\alpha$  can upregulate the transcription of glycolytic  
280 genes (Majmundar et al., 2010). Increased glycolytic enzyme levels might push RP cones to rely  
281 on glucose, rather than lactate, to their detriment if glucose is limited. To investigate whether  
282 HIF1 $\alpha$  might play a role in cone survival, a wt and a dominant-negative HIF1 $\alpha$  (dnHIF1 $\alpha$ ) allele  
283 (Jiang et al., 1996) were delivered to *rd1* retinas using AAV. A target gene of HIF1 $\alpha$ , *vegf*, which  
284 might improve blood flow and thus nutrient delivery, also was tested. The dnHIF1 $\alpha$  increased *rd1*  
285 cone survival, while wt HIF1 $\alpha$  and Vegf each decreased cone survival (Fig. 7a,b, Extended Data  
286 Fig. 6d,e).

287  
288 **Txnip effects on Glut1 levels in the RPE and cone survival.** Several lines of evidence support  
289 the hypothesis that RP cones do not have sufficient glucose to satisfy their needs via glycolysis  
290 (Chinchore et al., 2019; Kanow et al., 2017; Punzo et al., 2012, 2009; Wang et al., 2016). To  
291 determine if retention of glucose by the RPE might underlie a glucose shortage for cones (Kanow  
292 et al., 2017; Wang et al., 2016), we attempted to reprogram RPE metabolism to a more  
293 “OXPHOS” and less “glycolytic” status by overexpressing Txnip or dnHIF1 $\alpha$  with an RPE-specific  
294 promoter, the Best1 promoter (Esumi et al., 2009). The goal was to increase lactate consumption  
295 in the RPE, thus freeing up more glucose for delivery to cones. However, no RP cone rescue was  
296 observed (Extended Data Fig. 6b), possibly due to a clearance of Glut1 from the surface of cells,  
297 which would create a glucose shortage for both the RPE and the cones (Swarup et al., 2019)  
298 (Extended Data Fig. 6a). To examine the level of Glut1 in the RPE following introduction of wt  
299 Txnip, or Txnip.C247S.LL351&352AA, which should prevent efficient removal of Glut1,  
300 immunohistochemistry for Glut1 was carried out. This assay showed that AAV-Best1-  
301 Txnip.LL351&352AA did result in less clearance of Glut1 from the surface of the RPE (Extended  
302 Data Fig. 6a) relative to wt Txnip. Txnip.C247S.LL351&352AA was then tested for *rd1* cone  
303 rescue, where it was found to improve cone survival (Fig. 7a,b), in keeping with the model that the  
304 RPE retains glucose to the detriment of cones in RP.

305  
306 **Combination of Txnip.C247S with other rescue genes provides an additive effect.** Finally, as  
307 our goal is to provide effective, generic gene therapy for RP, and potentially other diseases that  
308 affect photoreceptor survival, we used combinations of AAVs that encode genes that we have  
309 previously shown prolong RP cone survival and vision. The combination of Txnip.C247S  
310 expression in cones, with expression of Nrf2, a gene with anti-oxidative damage and anti-  
311 inflammatory activity, in the RPE, provided an additive effect on cone survival relative to either  
312 gene alone (Fig. 8a,b). This combination also preserved the RP cone outer segments, which is the  
313 structure packed with opsin for photon detection, and reduced the mislocalization of opsin to the  
314 plasma membrane (Fig. 8c). An interesting phenotype that is especially prominent in the FVB *rd1*  
315 strain is that of “craters” in the photoreceptor layer. These are areas of circumscribed cone death  
316 that are obvious when the retina is viewed as a flat-mount. AAV-Best1-Nrf2 alone suppressed the  
317 formation of these craters (Wu et al., n.d.), while AAV-RedO-Txnip did not, despite the fact that  
318 AAV-RedO-Txnip.C247S provides the most robust RP cone rescue that we have seen (Fig.  
319 2a,6f,6h). An additional combination that was tested was AAV-RedO-Txnip.C247S with AAV-  
320 RedO-Tgfb1, an anti-inflammatory gene (Wang et al., 2020). This combination did not improve  
321 cone survival beyond that of Txnip alone, but almost completely eliminated the craters (Fig. 8d,e).  
322 In addition, we tried other genes in combination with wt Txnip, but did not observe any obvious  
323 improvement over Txnip alone (Extended Data Fig. 6e).

324  
325



## 326 Discussion

327 Photoreceptors have been characterized as being highly glycolytic, even under aerobic  
328 conditions, as originally described by Otto Warburg (Warburg, 1925). Glucose appears to be  
329 supplied primarily from the circulation, via the RPE, which has a high level of Glut1 (Gospe et al.,  
330 2010). Photoreceptors, at least rods, carry out glycolysis to support anabolism, to replace their  
331 outer segments (Chinchore et al., 2017), and contribute ATP, to run their ion pumps (Okawa et al.,  
332 2008). If glucose becomes limited, as has been proposed to occur in RP, cones may have  
333 insufficient fuel for their needs. To explore whether we could develop a therapy to address some of  
334 these metabolic shortcomings in RP, we delivered many different types of genes that might alter  
335 metabolic programming. From these, Txnip had the strongest benefit on cone survival and vision  
336 (Fig. 1 and Extended Data Fig. 1). This was surprising as Txnip has been shown to inhibit glucose  
337 uptake, by binding to and aiding in the removal of Glut1 from plasma membrane, and it inhibits the  
338 anti-oxidation proteins, the thioredoxins, again by direct binding. The results with Txnip in its wt  
339 form, and from the study of several mutant alleles, provide some insight into how it might benefit  
340 cones. The Txnip.C247S allele prevents binding to thioredoxins, and gave enhanced cone survival  
341 relative to wt Txnip (Fig. 2 and Extended Data Fig. 2). We speculate that, by being free of this  
342 interaction, the C247S mutant protein may be more available for other Txnip-mediated activities. In  
343 addition, thioredoxin may be made more available for its role in fighting oxidative damage.  
344

345 The mechanisms by which Txnip might benefit cones are not fully known, but a study of  
346 Txnip's function in skeletal muscle suggested that it plays a role in fuel selection (DeBalsi et al.,  
347 2014). If glucose is limited in RP, then cones may need to switch from a reliance on glucose and  
348 glycolysis to an alternative fuel(s), such as ketones, fatty acids, amino acids, or lactate. Cones  
349 express *oxct1* mRNA (Shekhar et al., 2016), which encodes a critical enzyme for ketone  
350 catabolism, suggesting cones are capable of ketolysis. In addition, a previous study showed that  
351 lipids might be an alternative energy source for cones by  $\beta$ -oxidation (Joyal et al., 2016). It is likely  
352 that cones can use these alternative fuels to meet their intense energy demands (Ingram et al.,  
353 2020) (Fig. 6,7). However, the Txnip rescue did not depend on ketolysis or  $\beta$ -oxidation (Fig. 3).  
354 Due to the diversity of amino acid catabolic pathways, we did not study whether these pathways  
355 were required for Txnip's rescue effect. However, we did discover that *Ldhb*, which converts  
356 lactate to pyruvate, was required. This is an interesting switch, as photoreceptors normally have  
357 high levels of *Ldha*, and produce lactate (Chinchore et al., 2017). An important factor in the  
358 reliance on *Ldhb* could be the availability of lactate, which is highly available from serum (Hui et  
359 al., 2017). Lactate could be transported via the RPE and/or Müller glia, and/or the internal retinal  
360 vasculature which comes in closer proximity to cones after rod death. Ketones are usually only  
361 available during fasting, and lipids are hydrophobic molecules which are slow to be transported  
362 across the plasma membranes. Moreover, lipids are required to rebuild the membrane-rich outer  
363 segments, and thus might be somewhat limited. *Ldhb* is not sufficient, however, to delay RP cone  
364 degeneration, as its overexpression did not promote RP cone survival.  
365

366 Txnip-treated RP cones also had larger mitochondria with a greater membrane potential,  
367 and likely were able to use the pyruvate produced by *Ldhb* for greater ATP production via  
368 OXPHOS. Indeed, Txnip-treated cones had an enhanced ATP:ADP ratio (Fig. 4). However,  
369 healthier mitochondria were not sufficient to prolong RP cone survival. Txnip.S308A led to larger  
370 mitochondria than control mitochondria, brighter JC-1 staining and mitoRFP signals, which are  
371 indicators of better mitochondrial health, but this allele did not induce greater cone survival (Fig. 5  
372 and Extended Data Fig. 5). Moreover, as Txnip has been shown to interact with *Parp1*, which can  
373 negatively affect mitochondria, we investigated if *Parp1* knock-out mice might have cones that  
374 survive longer in RP. Indeed, the *Parp1* knock-out mitochondria appeared to be healthier, but  
375 *Parp1* knock-out retinas did not have better RP cone survival than *Parp1*-wt *rd1* retinas. In  
376 addition, cone rescue by Txnip was not changed in the *Parp1* knock-out retinas.  
377

378 The well-described effects of Txnip on the removal of Glut1 from the cell membrane might  
379 seem at odds with the promotion of cone survival. It could be that removal of Glut1 from the  
380 plasma membrane of cones forces the cones to choose an alternative fuel, such as lactate, and  
381 perhaps others too. Interestingly, as Glut1 knock-down was not sufficient for cone survival, Txnip  
382 must not only lead to a reduction in membrane localized Glut1, but also potentiate a fuel switch,  
383 via an unknown mechanism(s) that at least involves an increase of Ldhd activity. A reduction in  
384 glycolysis might also lead to a fuel switch. Introduction of dnHIF1 $\alpha$ , which should reduce  
385 expression of glycolytic enzymes, also benefitted cones, while introduction of wt HIF1 $\alpha$  did not  
386 (Fig. 7). HIF1 $\alpha$  has many target genes, and may alter pathways in addition to that of glycolysis,  
387 thus also potentiating a fuel switch once glycolysis is down regulated. An additional finding  
388 supporting the notion that the level of glycolysis is important for cone survival was the observation  
389 that AAV-Pfkm plus AAV-Hk1 led to a reduction in cone survival (Extended Data Fig. 1e).  
390 Phosphorylation of glucose by Hk1 followed by phosphorylation of fructose-6-phosphate by the  
391 Pfkm complex commits glucose to glycolysis at the cost of ATP. These AAVs may have promoted  
392 the flux of glucose through glycolysis, which may have inhibited a fuel switch, and/or depleted the  
393 ATP pool, e.g. if downstream glycolytic intermediates were used for anabolic needs so that ATP  
394 production by glycolysis did not occur.  
395

396 The observations described above suggest that at least two different pathways are required  
397 for the promotion of cone survival by Txnip (Extended Data Fig. 8). One pathway requires lactate  
398 utilization via Ldhd, but as Ldhd was not sufficient, another pathway is also required. As greater  
399 mitochondrial health was observed following Txnip treatment, a second pathway may include the  
400 effects on mitochondria. This notion is supported by the observation that the addition of Ldhd to  
401 *parp1<sup>-/-</sup> rd1* cones, which have healthier mitochondria, led to improved cone survival (Fig. 5). Txnip  
402 alone may be able to promote cone health by impacting both lactate catabolism and mitochondrial  
403 health. There may be additional pathways required as well.  
404

405 The effects of Txnip alleles expressed only in the RPE provide some support for the  
406 hypothesis that the RPE transports glucose to cones for their use, while primarily using lactate for  
407 its own needs (Kanow et al., 2017; Swarup et al., 2019). Lactate is normally produced at high  
408 levels by photoreceptors in the healthy retina. When rods, which are 97% of the photoreceptors,  
409 die, lactate production goes down dramatically. The RPE might then need to retain glucose for its  
410 own needs. Introduction of an allele of Txnip, C247S.LL351&352AA, to the RPE provided a rescue  
411 effect for cones, while introduction of the wt allele of Txnip to the RPE did not. The LL351&352AA  
412 mutations lead to a loss of efficiency of the removal of Glut1 from the plasma membrane, while the  
413 C247S mutation might create an even less glycolytic RPE. The combination of these mutations  
414 might then allow more glucose to flow to cones. The untreated RP cones seem to be able to use  
415 glucose at a high concentration for ATP production, at least in freshly explanted retinas (Fig. 4a).  
416 These findings are also consistent with the reported mechanism for cone survival promoted by  
417 RdCVF, a factor that is proposed to improve glucose uptake by RP cones, which might be  
418 important if glucose is present in low concentration due to retention by the RPE (Ait-Ali et al.,  
419 2015; Byrne et al., 2015).  
420

421 As cones face multiple challenges in the degenerating RP retina, we tested Txnip in  
422 combination with genes that we have found to promote cone survival via other mechanisms. The  
423 combination of Txnip with vectors fighting oxidative stress (AAV-Best1-Nrf2) or inflammation (AAV-  
424 RedO-Tgfb1) supported greater cone survival than any of these treatments alone. These  
425 combinations utilize cell type-specific promoters, reducing the chances of side effects from global  
426 expression of these genes. Of note, the Nrf2 expression was limited to the RPE, yet was additive  
427 for cone survival. This finding is in keeping with the interdependence of photoreceptors and the  
428 RPE, which is undoubtedly important not only in a healthy retina, but in disease as well.  
429



## 430 **Methods**

### 431 Animals

432 *rd1* mice were the albino FVB strain, which carries the *Pde6b<sup>rd1</sup>* allele (MGI: 1856373). BALB/c,  
433 CD1, and FVB mice were purchased from Charles River Laboratories. Due to availability, part of  
434 the FVB mice were purchased from Taconic, and we did not notice any difference between the two  
435 sources in terms of cone degeneration rate. C57BL/6J, *rd10*, and *parp1<sup>-/-</sup>* mice were purchased  
436 from The Jackson Laboratories and bred in house. We crossed the *parp1<sup>-/-</sup>* mice with FVB mice to  
437 generate homozygous *parp1<sup>-/-</sup> rd1* and *parp1<sup>+/+</sup> rd1* mice. Genotyping of these mice was done by  
438 Transnetyx (Cordova, TN). The *rho<sup>-/-</sup>* mice were provided from by Lem (Tufts University, MA) (Lem  
439 et al., 1999).

440  
441

### 442 AAV vector design, authentication, and preparation

443 Detailed information of all AAVs used in this study is listed in Supplementary Table 1, along with  
444 the authentication information. cDNAs of mouse *txnip*, *hif1a*, *hk2*, *ldha*, *ldhb*, *slc2a1*, *bsg1*, *cpt1a*,  
445 *oxct1*, *mpc1* and *mpc2*, and human *nrf2*, were purchased from GeneCopeia (Rockville, MD).  
446 Mouse *vegf164* cDNA (Robinson and Stringer, 2001) was synthesized by Integrated DNA  
447 Technologies (Coralville, Iowa). We obtained the following plasmids as gifts from various  
448 depositors through Addgene (Watertown, MA): *hk1*, *pfkm* and *pkm2* (William Hahn & David Root;  
449 #23730, #23728, #23757), *pkm1* (Lewis Cantley & Matthew Vander Heiden; #44241), H2B-GFP  
450 (Geoff Wahl; #11680), mitoRFP (i.e. DsRed2-mito, Michael Davidson; #55838), GFP-Txnip (Clark  
451 Distelhorst; #18758), W3SL (Bong-Kiun Kaang; #61463), 3xFLAG (Thorsten Mascher, #55180),  
452 PercevalHR and pHRed (Gary Yellen; #490820, #31473). The cDNA of mouse RdCVF was a gift  
453 from Leah Byrne and John Flannery (UC Berkeley, CA). iGlucoSnFR was provided under a  
454 Material Transfer Agreement by Jacob Keller and Loren Looger (Janelia Research Campus, VA).  
455 RedO promoter was provided as a gift, and SynPVI and SynP136 promoters were provided under  
456 a Material Transfer Agreement, from Botond Roska (IOB, Switzerland). The Best1 promoter was  
457 synthesized by lab member, Wenjun Xiong, using Integrated DNA Technologies based on  
458 literature (Esumi et al., 2009). Mutated Txnip, dominant-negative HIF1 $\alpha$  (Jiang et al., 1996) and  
459 RO1.7 promoter (Ye et al., 2016) were created from the corresponding wildtype plasmids in house  
460 using Gibson assembly.

461

462 All of the new constructs in this study were cloned using Gibson assembly. For example, AAV-  
463 RedO-Txnip was cloned by replacing the EGFP sequence of AAV-RedO-EGFP at the NotI/HindIII  
464 sites, with the Txnip sequence, which was PCR-amplified from the cDNA vector adding two 20-bp  
465 overlapping sequences at the 5'- and 3'-ends. All of the AAV plasmids were amplified using Stbl3  
466 *E. coli* (Thermo Fisher Scientific). The sequences of all AAV plasmids were verified with directed  
467 sequencing and restriction enzyme digestion. The key plasmids were triple-verified with Next-  
468 Generation complete plasmid sequencing (MGH CCIB DNA Core), which is able to capture the full  
469 sequence of the ITR regions. The genome sequence of critical AAVs (i.e. AAV8-RedO-  
470 Txnip.C247S and AAV8-RedO-Txnip.S308A) were quadruple-verified with PCR and directed  
471 sequencing.

472

473 All of the vectors were packaged in recombinant AAV8 capsids using HEK293T cells and purified  
474 with iodixanol gradient as previously described (Grieger et al., 2006; Xiong et al., 2015). The titer  
475 of each AAV batch was determined using protein gels, comparing viral band intensities with a  
476 previously established AAV standard. The concentration of our AAV production usually ranged  
477 from  $2 \times 10^{12}$  to  $3 \times 10^{13}$  gc/mL. Multiple batches of key AAV vectors (e.g. 4 batches of AAV8-  
478 RedO-Txnip, and 3 batches of AAV-RedO-siLdhd<sup>(#2)</sup>) were made and tested *in vivo* to avoid any  
479 unknown batch effects.

480

481

## 482 shRNA

483 The shRNA plasmids of *Ldhb*, *Slc2a1*, *Oxct1* and *Cpt1a* were purchased from GeneCopeia, and  
484 they were provided as three or four distinct sequences for each gene, driven by the H1 or U6  
485 promoter. The knockdown efficiency of these candidate shRNA sequences was tested by co-  
486 transfecting with CAG-TargetGene-IRES-d2GFP vector in HEK293T cells as previously described  
487 (Matsuda and Cepko, 2007; Wang et al., 2014). The GFP fluorescence intensity served as a fast  
488 and direct read out of the knockdown efficiency of these shRNAs. Using this method, we selected  
489 the following sense strand sequences to knockdown the targeted genes (Extended Data Fig. 8-  
490 11): siLdhb<sup>(#2)</sup> 5'-CCATCATCGTGGTTTCCAACC-3'; siLdhb<sup>(#1)</sup> 5'-  
491 GCAGAGAAATGTCAACGTGTT-3'; siLdhb<sup>(#3)</sup> 5'-GCCGATAAAGATTACTCTGTG-3'; siSlc2a1<sup>(#a)</sup>  
492 5'-GGTTATTGAGGAGTTCTACAA-3'; siOxct1<sup>(#c)</sup> 5'-GGAAACAGTTACTGTTCTCCC-3';  
493 siCpt1a<sup>(#c)</sup> 5'-GCATAAACGCAGAGCATTCT-3'; and siNC (non-targeting scrambled control  
494 sequence) 5'-GCTTCGCGCCGTAGTCTTA-3'. We cloned the entire hairpin sequence (including a  
495 6-bp 5'-end lead sequence 5'-gatccg-3', a 7-bp loop sequence 5'-TCAAGAG-3' between sense  
496 and antisense strands, and a > 7-bp 3'-end sequence 5'-tttttg-3') and packaged them into AAV8-  
497 RedO-shRNA using Gibson assembly as described above. To maximize the knockdown efficacy  
498 using a Pol II promoter in AAV (Giering et al., 2008), no extra base pair was kept between the  
499 RedO promoter and the 5'-end lead sequence of shRNAs. Due to the lack of an adequate *Ldhb*  
500 antibody, we confirmed the *in vivo* *Ldhb* knockdown efficiency of all three AAV8-RedO-siLdhb  
501 vectors by co-injection with an AAV8-*Ldhb*-3xFLAG vector into wildtype mouse eyes and detection  
502 for FLAG immunofluorescence as described in the Histology section below (Extended Data Fig.  
503 3a).

504  
505

## 506 Subretinal injection

507 On the day of birth (P0),  $\approx 1 \times 10^9$  vg/eye of AAV was injected into the eyes of pups as previously  
508 described (Matsuda and Cepko, 2007; Xiong et al., 2015). For all experiments in which cones were  
509 quantified, and to provide a means to trace infection (e.g. for immunohistochemistry),  $2.5 \times 10^8$   
510 vg/eye of AAV8-RedO-H2BGFP was co-injected with other AAVs, or alone as a control. For all  
511 other experiments, such as FACS sorting and *ex vivo* live-imaging,  $1 \times 10^9$  vg/eye of AAV8-  
512 SynP136-H2BGFP was co-injected.

513  
514

## 515 Photopic visual acuity measured for optomotor response

516 The photopic optomotor response of mice were measured using the OptoMotry System  
517 (CerebralMechanics) at a background light of  $\approx 70$  cd/m<sup>2</sup> as previously described (Xiong et al.,  
518 2019). The contrast of the gratings was set to be 100%, and temporal frequency was 1.5 Hz. The  
519 threshold of mouse visual acuity (i.e. maximal spatial frequency) was tested by an examiner  
520 without knowledge of the injected or the treatment group. During each test, the direction of  
521 movement of the gratings (i.e. clockwise or counterclockwise) was randomized, and the spatial  
522 frequency of each testing episode was determined by the software. Without knowing the spatial  
523 frequency of the moving gratings, the examiner reported either "yes" or "no" to the system until the  
524 threshold of acuity was determined by the software.

525  
526

## 527 Histology

528 Mice were euthanized with CO<sub>2</sub> and cervical dislocation, and the eye was enucleated. For flat-  
529 mounts, retinas were separated from the rest of the eye using a dissecting microscope and were  
530 fixed in 4% paraformaldehyde solution for 30 minutes. The retinas were then flat mounted on a  
531 glass slide and coverslip. For H2BGFP labeled cone imaging, we used a Keyence microscope with  
532 a 10x objective (Plan Apo Lambda 10x/0.45 Air DIC N1) and GFP filter box (OP66836).

533

534 For cone opsin antibody staining in whole-mount retinas, after fixation, retinas were blocked for 1  
535 hour in PBS with 5% normal donkey serum and 0.3% Triton X-100 at room temperature. After  
536 blocking, retinas were incubated with a mixture of 1:200 anti-s-opsin antibody (AB5407, EMD  
537 Millipore) and 1:600 anti-m-opsin antibody (AB5405, EMD Millipore) in the same blocking solution  
538 overnight at 4 °C, followed by secondary donkey-anti-rabbit antibody staining (1:1000, Alexa Fluor  
539 594) at room temperature for 2 hours, then flat-mounted on a glass slide and coverslip.

540  
541 For frozen sections, whole eyes were fixed in 4% paraformaldehyde solution for 2 hours at room  
542 temperature, followed by removing the cornea, lens and iris. Then the eye cups went through 15%  
543 and 30% sucrose gradient to dehydrate at room temperature, followed by overnight incubation in  
544 1:1 30% sucrose and Tissue-Tek® O.C.T. solution at 4 °C. Eye cups were embedded in a plastic  
545 mold, frozen in a -80 °C freezer, and cut into 20 µm or 12 µm thin radial cross-sections which were  
546 placed on glass slides. Antibody staining was done similarly to whole-mounts as described above  
547 and previously (Wang et al., 2014). PBS with 0.1% Triton X-100, 5% normal donkey serum and  
548 1% bovine serum albumin (BSA) was used as the blocking solution, except for FLAG detection  
549 (10% donkey serum and 3% BSA). Glut1 (encoded by *slc2a1* gene) antibody (GT11-A, Alpha  
550 Diagnostics) was used at 1:300 dilution, Parp1 antibody (ab227244, Abcam) was used at 1:300  
551 dilution, GFP antibody (ab13970, Abcam) was used at 1:1000 dilution to detect GFP-Txnip, and  
552 FLAG antibody (ab1257, Abcam) was used at 1:2000 based on a previous study (Ferrando et al.,  
553 2015). If applicable, 1:1000 PNA (CY5 or Rhodamine labeled) for cone extracellular matrix  
554 labeling, and 1:1000 DAPI were used to co-stain with secondary antibodies. Stained sections were  
555 imaged with a confocal microscope (LSM710, Zeiss) using 20x or 63x objectives (Plan Apo  
556 20x/0.8 Air DIC II, or Plan Apo 63X/1.4 Oil DIC III).

557  
558

#### 559 Automated RP cone counting

560 The cone-H2BGFP images of whole flat-mounted retinas were first analyzed in ImageJ to acquire  
561 the diameter and the center parameters of the sample. We used a custom MATLAB script to  
562 automatically count the number of H2BGFP-positive cones in the central half of the retina, since  
563 RP cones degenerate faster in the central than the peripheral retina. The algorithm was based on  
564 a Gaussian model to identify the centers of labeled cells, and published recently (Wu et al., n.d.).  
565 The threshold of peak intensity and the variance of distribution were initially determined using  
566 visual inspection, and a comparison to the number of manually counted cones from 6 retinas. The  
567 threshold of intensity and variance thus determined were then set at fixed values for all the  
568 experiments that used cone quantification. The background intensity did not interfere with the  
569 accurate counting on the raw images by this MATLAB script, despite the representative images at  
570 low-magnification might look differently.

571  
572

#### 573 Live-imaging of cones on ex vivo retinal explants

574 For JC-1 mitochondrial dye staining, the retina was quickly dissected in a solution of 50% Ham's F-  
575 12 Nutrient Mix (11765054, Thermo Fisher Scientific) and 50% Dulbecco's Modified Eagle Medium  
576 (DMEM; 11995065, Thermo Fisher Scientific) at room temperature. They were then incubated in a  
577 culture solution containing 50% Fluorobrite DMEM (A1896701, Thermo Fisher Scientific), 25%  
578 heat inactivated horse serum (26050088, Thermo Fisher Scientific) and 25% Hanks' Balanced Salt  
579 Solution (HBSS; 14065056, Thermo Fisher Scientific) with 2 µM JC-1 dye (M34152, Thermo  
580 Fisher Scientific) at 37 °C in a 5% CO<sub>2</sub> incubator for 20 minutes. The retinas were washed in 37 °C  
581 culture medium without JC-1 for three times, transferred in a glass-bottom culture dish (MatTek  
582 P50G-1.5-30-F) with culture medium, and imaged using a confocal microscope (LSM710 Zeiss),  
583 which was equipped with a chamber pre-heated to 37 °C with pre-filled 5% CO<sub>2</sub>. Right before  
584 imaging, a cover slip (VWR 89015-725) was gently applied to flatten the retina. Regions of interest  
585 (with H2BGFP as an indicator of successful AAV infection and to set the correct focal plane on the

586 cone layer) were selected under the eyepiece with a 63x objective (Plan Apo 63X/1.4 Oil DIC III).  
587 Fluorescent images from the same region of interest were obtained with the excitation-wavelength  
588 in the order of 561 nm (for J-aggregates), 514 nm (for JC-1 monomer), and 488 nm (for H2BGFP).  
589 Four different regions of interest from the central part of the same retina were imaged before  
590 moving to the next retina.

591  
592 For RH421 (Na<sup>+</sup>/K<sup>+</sup> ATPase dye) staining, similar steps were taken as for JC-1 staining, with the  
593 following modifications: 1) 0.83 μM RH421 dye (61017, Biotium) was added to the glass-bottom  
594 culture dishes just before imaging, but not during incubation in the incubator, due to the fast action  
595 of RH421. 2) 5 regions of interest were imaged per retina from the central area. 3) The dissection  
596 and culture medium were lactate-only medium (see below). 4) Excitation wavelengths: 561 nm  
597 (RH421), and 488 nm (H2BGFP).

598  
599 For imaging genetically-encoded metabolic sensors (PercevalHR, iGlucoSnFR and pHRed),  
600 retinas were placed in the incubator for 12 minutes and then taken to confocal imaging without any  
601 staining. For the high-glucose condition, the culture medium described above contains ≈15 mM  
602 glucose without lactate or pyruvate. For the lactate-only condition, the culture and dissection  
603 media were both glucose-pyruvate-free DMEM (A144300, Thermo Fisher Scientific) and were  
604 supplemented with 20mM sodium L-lactate (71718, Sigma-Aldrich). For the pyruvate-only  
605 condition, the culture and dissection media, were both glucose-pyruvate-free DMEM plus 10 or 20  
606 mM sodium pyruvate (P2256, Sigma-Aldrich). No AAV-H2BGFP was co-injected with these  
607 sensors, since the sensors themselves could be used to trace the area of infection. The excitation  
608 wavelengths for sensors were 488 nm and 405 nm (PercevalHR, ratiometric high and low  
609 ATP:ADP), 488 nm and 561 nm (iGlucoSnFR, glucose-sensing GFP and normalization mRuby),  
610 and 561 nm and 458 nm (pHRed, ratiometric low and high pH).

611  
612 The fluorescent intensity of all acquired images was measured by ImageJ. The ratio of  
613 sensors/dye was normalized to averaged control results taken at the same condition.

614  
615

### 616 Flow cytometry and cell sorting

617 All flow cytometry and cell sorting were performed on MoFlo Astrios EQ equipment. Retinas were  
618 freshly dissected and dissociated using cysteine-activated papain followed by gentle pipetting  
619 (Shekhar et al., 2016). Before sorting, all samples were passed through a 35-μm filter with buffer  
620 containing Fluorobrite DMEM (A1896701, Thermo Fisher Scientific) and 0.4% BSA. Cones labeled  
621 with AAV8-SynP136-H2BGFP (highly cone-specific) were sorted into the appropriate buffer for  
622 either ddPCR or RNA-sequencing.

623  
624

### 625 RNA sequencing

626 RNA sequencing was done as previously described (Wang et al., 2019). 1,000 H2BGFP-positive  
627 cones per retina were sorted into 10 μL of Buffer TCL (Qiagen) containing 1% β-mercaptoethanol  
628 and immediately frozen in -80 °C. On the day of sample submission, the frozen cone lysates were  
629 thawed on ice and loaded into a 96-well plate for cDNA library synthesis and sequencing. A  
630 modified Smart-Seq2 protocol was performed on samples by the Broad Institute Genomics  
631 Platform with ~6 million reads per sample (Picelli et al., 2013). The reads were mapped to the  
632 GRCm38.p6 reference genome after quality control measures. Reads assigned to each gene were  
633 quantified using featureCounts (Liao et al., 2014). Count data were analyzed using DESeq2 to  
634 identify differentially expressed genes, with an adjusted *p* value less than 0.05 considered  
635 significant (Anders and Huber, 2010). The raw results have been deposited to Gene Expression  
636 Omnibus (accession number GSE161622).

637



538

### 539 ddPCR

540 RNA was isolated from 20,000 sorted cones per retina using RNeasy Micro Kit (Qiagen) as  
541 previously described (Wang et al., 2020), and converted to cDNA using the SuperScript III First-  
542 Strand Synthesis System (Invitrogen). cDNA from each sample was packaged in droplets for  
543 Droplet Digital™ PCR (ddPCR) using QX200 EvaGreen Supermix (#1864034). The reads of  
544 expression were normalized to the housekeeping gene *Hprt*. Sequences for RT-PCR primers were  
545 designed using the IDT online RealTime qPCR primer design tool. The following primers were  
546 selected for the genes of interest: *Txnip* (forward 5'-ACATTATCTCAGGGACTTGCG-3'; reverse  
547 5'-AAGGATGACTTTCTTGGAGCC-3'), *Hprt* (forward 5'-TCAGTCAACGGGGGACATAAA-3';  
548 reverse 5'-GGGGCTGTAAGCTTAACCAG-3'), *mt-Nd4* (forward 5'-  
549 AGCTCAATCTGCTTACGCCA-3'; reverse 5'-TGTGAGGCCATGTGCGATTA-3'), *mt-Cytb* (forward  
550 5'-ATTCTACGCTCAATCCCAAT-3'; reverse 5'-TATGAGATGGAGGCTAGTTGGC-3'), *mt-Co1*  
551 (forward 5'-TCTGTTCTGATTCTTTGGGCACC-3'; reverse 5'-CTACTGTGAATATGTGGTGGGCT-  
552 3'), *Acs13* (forward 5'-AACCACGTATCTTCAACACCATC-3'; reverse 5'-  
553 AGTCCGGTTTGGAACTGACAG-3'), and *Ftl1* (forward 5'-CCATCTGACCAACCTCCGC-3';  
554 reverse 5'-CGCTCAAAGAGATACTCGCC-3')).

555

556

### 557 Electron microscopy

558 Intracardial perfusion (4% PFA+1% glutaraldehyde) was performed on ketamine/xylazine (100/10  
559 mg/kg) anesthetized mice before the removal of eyes. The cornea was sliced open and the eye  
560 was fixed with a fixative buffer (1.25% formaldehyde+ 2.5 % glutaraldehyde + 0.03% picric acid in  
561 0.1 M sodium cacodylate buffer, pH 7.4) overnight at 4 °C. The cornea, lens and retina were  
562 removed before resin embedding, ultrathin sectioning and negative staining at Harvard Medical  
563 School Electron Microscopy Core. The detailed methods can be found on the core's website  
564 (<https://electron-microscopy.hms.harvard.edu/methods>). The stained thin sections were imaged on  
565 a conventional transmission electron microscope (JEOL 1200EX) with an AMT 2k CCD camera.

566

567

### 568 Statistics

569 For the comparison of two sample groups, two-tailed unpaired Student's t test was used to test for  
570 the significance of difference, except for P140 *rho*<sup>-/-</sup> optomotor assay (paired two-tail t-test). For  
571 comparison of more than two sample groups, ANOVA and Dunnett's multiple comparison test was  
572 performed in Prism 8 software to determine the significance. A *p* value of less than 0.05 was  
573 considered statistically significant. All error bars are presented as mean ± standard deviation,  
574 except for the *rd10* optomotor assays (mean ± SEM).

575

576

### 577 Study approval

578 All animal experiments were approved by the IACUC of Harvard University in accordance with  
579 institutional guidelines.

580

581



## 582 References

- 583 Ait-Ali N, Fridlich R, Millet-Puel G, Clérin E, Delalande F, Jaillard C, Blond F, Perrocheau L,  
584 Reichman S, Byrne LCC, Olivier-Bandini A, Bellalou J, Moyse E, Bouillaud F, Nicol X, Dalkara  
585 D, van Dorsselaer A, Sahel J-A, Léveillard T, van Dorsselaer A, Sahel J-A, Léveillard T. 2015.  
586 Rod-Derived Cone Viability Factor Promotes Cone Survival by Stimulating Aerobic Glycolysis.  
587 *Cell* **161**:817–832. doi:10.1016/j.cell.2015.03.023
- 588 Anders S, Huber W. 2010. Differential expression analysis for sequence count data. *Genome Biol*  
589 **11**:R106. doi:10.1186/gb-2010-11-10-r106
- 590 Brodier L, Rodrigues T, Matter-Sadzinski L, Matter J-M. 2020. A transient decrease in  
591 mitochondrial activity is required to establish the ganglion cell fate in retina adapted for high  
592 acuity vision. *bioRxiv* 2020.03.23.002998. doi:10.1101/2020.03.23.002998
- 593 Byrne LC, Dalkara D, Luna G, Fisher SK, Clérin E, Sahel J-A, Léveillard T, Flannery JG. 2015.  
594 Viral-mediated RdCVF and RdCVFL expression protects cone and rod photoreceptors in  
595 retinal degeneration. *J Clin Invest* **125**:105–16. doi:10.1172/JCI65654
- 596 Cehajic-Kapetanovic J, Xue K, Martinez-Fernandez de la Camara C, Nanda A, Davies A, Wood  
597 LJ, Salvetti AP, Fischer MD, Aylward JW, Barnard AR, Jolly JK, Luo E, Lujan BJ, Ong T,  
598 Girach A, Black GCM, Gregori NZ, Davis JL, Rosa PR, Lotery AJ, Lam BL, Stanga PE,  
599 MacLaren RE. 2020. Initial results from a first-in-human gene therapy trial on X-linked retinitis  
700 pigmentosa caused by mutations in RPGR. *Nat Med*. doi:10.1038/s41591-020-0763-1
- 701 Chang B, Hawes NL, Pardue MT, German AM, Hurd RE, Davisson MT, Nusinowitz S, Rengarajan  
702 K, Boyd AP, Sidney SS, Phillips MJ, Stewart RE, Chaudhury R, Nickerson JM, Heckenlively  
703 JR, Boatright JH. 2007. Two mouse retinal degenerations caused by missense mutations in  
704 the  $\beta$ -subunit of rod cGMP phosphodiesterase gene. *Vision Res* **47**:624–633.  
705 doi:10.1016/j.visres.2006.11.020
- 706 Chinchore Y, Begaj T, Guillermeir C, Steinhauser M, Punzo C, Cepko C. 2019. Transduction of  
707 gluconeogenic enzymes prolongs cone photoreceptor survival and function in models of  
708 retinitis pigmentosa. *bioRxiv* 569665. doi:10.1101/569665
- 709 Chinchore Y, Begaj T, Wu D, Drokhlyansky E, Cepko CL. 2017. Glycolytic reliance promotes  
710 anabolism in photoreceptors. *Elife* **6**. doi:10.7554/eLife.25946
- 711 DeBalsi KL, Wong KE, Koves TR, Slentz DH, Seiler SE, Wittmann AH, Ilkayeva OR, Stevens RD,  
712 Perry CGR, Lark DS, Hui ST, Szweda L, Neuffer PD, Muoio DM. 2014. Targeted  
713 Metabolomics Connects Thioredoxin-interacting Protein (TXNIP) to Mitochondrial Fuel  
714 Selection and Regulation of Specific Oxidoreductase Enzymes in Skeletal Muscle. *J Biol*  
715 *Chem* **289**:8106–8120. doi:10.1074/jbc.M113.511535
- 716 Esumi N, Kachi S, Hackler L, Masuda T, Yang Z, Campochiaro PA, Zack DJ. 2009. BEST1  
717 expression in the retinal pigment epithelium is modulated by OTX family members. *Hum Mol*  
718 *Genet* **18**:128–141. doi:10.1093/hmg/ddn323
- 719 Eventoff W, Rossmann MG, Taylor SS, Torff HJ, Meyer H, Keil W, Kiltz HH. 1977. Structural  
720 adaptations of lactate dehydrogenase isozymes. *Proc Natl Acad Sci U S A* **74**:2677–2681.  
721 doi:10.1073/pnas.74.7.2677
- 722 Fedosova NU, Cornelius F, Klodos I. 1995. Fluorescent Styryl Dyes as Probes for Na,K-ATPase  
723 Reaction Mechanism: Significance of the Charge of the Hydrophilic Moiety of RH Dyes.  
724 *Biochemistry* **34**:16806–16814. doi:10.1021/bi00051a031
- 725 Fehr AR, Singh SA, Kerr CM, Mukai S, Higashi H, Aikawa M. 2020. The impact of PARPs and  
726 ADP-ribosylation on inflammation and host-pathogen interactions. *Genes Dev*.  
727 doi:10.1101/gad.334425.119
- 728 Ferrando RE, Newton K, Chu F, Webster JD, French DM. 2015. Immunohistochemical Detection  
729 of FLAG-Tagged Endogenous Proteins in Knock-In Mice. *J Histochem Cytochem* **63**:244–255.  
730 doi:10.1369/0022155414568101
- 731 Forred BJ, Neuharth S, Kim DI, Amolins MW, Motamedchaboki K, Roux KJ, Vitiello PF. 2016.  
732 Identification of Redox and Glucose-Dependent Txnip Protein Interactions. *Oxid Med Cell*  
733 *Longev* **2016**. doi:10.1155/2016/5829063

- 734 Giering JC, Grimm D, Storm TA, Kay MA. 2008. Expression of shRNA from a tissue-specific pol II  
735 promoter is an effective and safe RNAi therapeutic. *Mol Ther* **16**:1630–1636.  
736 doi:10.1038/mt.2008.144
- 737 Gospe SM, Baker SA, Arshavsky VY. 2010. Facilitative glucose transporter Glut1 is actively  
738 excluded from rod outer segments. *J Cell Sci* **123**:3639–3644. doi:10.1242/jcs.072389
- 739 Grenell A, Wang Y, Yam M, Swarup A, Dilan TL, Hauer A, Linton JD, Philp NJ, Gregor E, Zhu S,  
740 Shi Q, Murphy J, Guan T, Lohner D, Kolandaivelu S, Ramamurthy V, Goldberg AFX, Hurley  
741 JB, Du J. 2019. Loss of MPC1 reprograms retinal metabolism to impair visual function. *Proc*  
742 *Natl Acad Sci U S A* **116**:3530–3535. doi:10.1073/pnas.1812941116
- 743 Grieger JC, Choi VW, Samulski RJ. 2006. Production and characterization of adeno-associated  
744 viral vectors. *Nat Protoc*. doi:10.1038/nprot.2006.207
- 745 Hartong DT, Berson EL, Dryja TP. 2006. Retinitis pigmentosa. *Lancet* **368**:1795–809.  
746 doi:10.1016/S0140-6736(06)69740-7
- 747 Hoang Q, Linsenmeier R, Chung C, Curcio C. 2002. Photoreceptor inner segments in monkey and  
748 human retina: mitochondrial density, optics, and regional variation. *Vis Neurosci* **19**:395–407.  
749 doi:10.1017/s0952523802194028
- 750 Hocsak E, Szabo V, Kalman N, Antus C, Cseh A, Sumegi K, Eros K, Hegedus Z, Gallyas F,  
751 Sumegi B, Racz B. 2017. PARP inhibition protects mitochondria and reduces ROS production  
752 via PARP-1-ATF4-MKP-1-MAPK retrograde pathway. *Free Radic Biol Med* **108**:770–784.  
753 doi:10.1016/j.freeradbiomed.2017.04.018
- 754 Hood DA, Adhihetty PJ, Colavecchia M, Gordon JW, Irrcher I, Joseph AM, Lowe ST, Rungti AA.  
755 2003. Mitochondrial biogenesis and the role of the protein import pathway. *Med Sci Sports*  
756 *Exerc* **35**:86–94. doi:10.1097/00005768-200301000-00015
- 757 Hui S, Ghergurovich JM, Morscher RJ, Jang C, Teng X, Lu W, Esparza LA, Reya T, Zhan L,  
758 Yanxiang Guo J, White E, Rabinowitz JD. 2017. Glucose feeds the TCA cycle via circulating  
759 lactate. *Nature* **551**:115–118. doi:10.1038/nature24057
- 760 Hwang J, Suh HW, Jeon YH o., Hwang E, Nguyen LT, Yeom J, Lee SG, Lee C, Kim KJ i., Kang  
761 BS i., Jeong JO, Oh TK, Choi I, Lee JO, Kim MH e. 2014. The structural basis for the negative  
762 regulation of thioredoxin by thioredoxin-interacting protein. *Nat Commun* **5**:2958.  
763 doi:10.1038/ncomms3958
- 764 Ingram NT, Fain GL, Sampath AP. 2020. Elevated energy requirement of cone photoreceptors.  
765 *Proc Natl Acad Sci U S A* **117**:19599–19603. doi:10.1073/pnas.2001776117
- 766 Jiang BH, Rue E, Wang GL, Roe R, Semenza GL. 1996. Dimerization, DNA binding, and  
767 transactivation properties of hypoxia- inducible factor 1. *J Biol Chem* **271**:17771–17778.  
768 doi:10.1074/jbc.271.30.17771
- 769 Joyal J-S, Sun Y, Gantner ML, Shao Z, Evans LP, Saba N, Fredrick T, Burnim S, Kim JS, Patel G,  
770 Juan AM, Hurst CG, Hatton CJ, Cui Z, Pierce KA, Bherer P, Aguilar E, Powner MB, Vevis K,  
771 Boisvert M, Fu Z, Levy E, Fruttiger M, Packard A, Rezende FA, Maranda B, Sapieha P, Chen  
772 J, Friedlander M, Clish CB, Smith LEH. 2016. Retinal lipid and glucose metabolism dictates  
773 angiogenesis through the lipid sensor Ffar1. *Nat Med* **22**:439–445. doi:10.1038/nm.4059
- 774 Junn E, Han SH, Im JY, Yang Y, Cho EW, Um HD, Kim DK, Lee KW, Han PL, Rhee SG, Choi I.  
775 2000. Vitamin D3 up-regulated protein 1 mediates oxidative stress via suppressing the  
776 thioredoxin function. *J Immunol* **164**:6287–95.
- 777 Jüttner J, Szabo A, Gross-Scherf B, Morikawa RK, Rompani SB, Hantz P, Szikra T, Esposti F,  
778 Cowan CS, Bharioke A, Patino-Alvarez CP, Keles Ö, Kusnyerik A, Azoulay T, Hartl D, Krebs  
779 AR, Schübeler D, Hajdu RI, Lukats A, Nemeth J, Nagy ZZ, Wu KC, Wu RH, Xiang L, Fang XL,  
780 Jin ZB, Goldblum D, Hasler PW, Scholl HPN, Krol J, Roska B. 2019. Targeting neuronal and  
781 glial cell types with synthetic promoter AAVs in mice, non-human primates and humans. *Nat*  
782 *Neurosci* **22**:1345–1356. doi:10.1038/s41593-019-0431-2
- 783 Kang Y, Zhou XE, Gao X, He Y, Liu W, Ishchenko A, Barty A, White TA, Yefanov O, Han GW, Xu  
784 Q, De Waal PW, Ke J, Tan MHE, Zhang C, Moeller A, West GM, Pascal BD, Van Eps N, Caro  
785 LN, Vishnivetskiy SA, Lee RJ, Suino-Powell KM, Gu X, Pal K, Ma J, Zhi X, Boutet S, Williams

- 786 GJ, Messerschmidt M, Gati C, Zatsepin NA, Wang D, James D, Basu S, Roy-Chowdhury S,  
787 Conrad CE, Coe J, Liu H, Lisova S, Kupitz C, Grotjohann I, Fromme R, Jiang Y, Tan M, Yang  
788 H, Li J, Wang M, Zheng Z, Li D, Howe N, Zhao Y, Standfuss J, Diederichs K, Dong Y, Potter  
789 CS, Carragher B, Caffrey M, Jiang H, Chapman HN, Spence JCH, Fromme P, Weierstall U,  
790 Ernst OP, Katritch V, Gurevich V V., Griffin PR, Hubbell WL, Stevens RC, Cherezov V,  
791 Melcher K, Xu HE. 2015. Crystal structure of rhodopsin bound to arrestin by femtosecond X-  
792 ray laser. *Nature* **523**:561–567. doi:10.1038/nature14656
- 793 Kanow MA, Giarmarco MM, Jankowski CS, Tsantilas K, Engel AL, Du J, Linton JD, Farnsworth  
794 CC, Sloat SR, Rountree A, Sweet IR, Lindsay KJ, Parker ED, Brockerhoff SE, Sadilek M,  
795 Chao JR, Hurley JB. 2017. Biochemical adaptations of the retina and retinal pigment  
796 epithelium support a metabolic ecosystem in the vertebrate eye. *Elife* **6**.  
797 doi:10.7554/eLife.28899
- 798 Katsu-Jiménez Y, Vázquez-Calvo C, Maffezzini C, Halldin M, Peng X, Freyer C, Wredenberg A,  
799 Giménez-Cassina A, Wedell A, Arnér ESJ. 2019. Absence of TXNIP in humans leads to lactic  
300 acidosis and low serum methionine linked to deficient respiration on pyruvate. *Diabetes*  
301 **68**:709–723. doi:10.2337/db18-0557
- 302 Keller J, Marvin J, Lacin H, Lemon W, Shea J, Kim S, Lee R, Koyama M, Keller P, Looger L. 2019.  
303 In Vivo Glucose Imaging in Multiple Model Organisms with an Engineered Single-Wavelength  
304 Sensor. *SSRN Electron J* 571422. doi:10.1101/571422
- 305 Komeima K, Rogers BS, Lu L, Campochiaro PA. 2006. Antioxidants reduce cone cell death in a  
306 model of retinitis pigmentosa. *Proc Natl Acad Sci U S A* **103**:11300–11305.  
307 doi:10.1073/pnas.0604056103
- 308 Lem J, Krasnoperova N V., Calvert PD, Kosaras B, Cameron DA, Nicolò M, Makino CL, Sidman  
309 RL. 1999. Morphological, physiological, and biochemical changes in rhodopsin knockout mice.  
310 *Proc Natl Acad Sci U S A* **96**:736–741. doi:10.1073/pnas.96.2.736
- 311 Liao Y, Smyth GK, Shi W. 2014. FeatureCounts: An efficient general purpose program for  
312 assigning sequence reads to genomic features. *Bioinformatics* **30**:923–930.  
313 doi:10.1093/bioinformatics/btt656
- 314 Maguire AM, Russell S, Wellman JA, Chung DC, Yu ZF, Tillman A, Wittes J, Pappas J, Elci O,  
315 Marshall KA, McCague S, Reichert H, Davis M, Simonelli F, Leroy BP, Wright JF, High KA,  
316 Bennett J. 2019. Efficacy, Safety, and Durability of Voretigene Neparvovec-rzyl in RPE65  
317 Mutation–Associated Inherited Retinal Dystrophy: Results of Phase 1 and 3 Trials.  
318 *Ophthalmology* **126**:1273–1285. doi:10.1016/j.ophtha.2019.06.017
- 319 Majmundar AJ, Wong WJ, Simon MC. 2010. Hypoxia-inducible factors and the response to  
320 hypoxic stress. *Mol Cell* **40**:294–309. doi:10.1016/j.molcel.2010.09.022
- 321 Matsuda T, Cepko CL. 2007. Controlled expression of transgenes introduced by *in vivo*  
322 electroporation. *Proc Natl Acad Sci* **104**:1027–1032. doi:10.1073/pnas.0610155104
- 323 Nishinaka Y, Masutani H, Nakamura H, Yodoi J. 2001. Regulatory roles of thioredoxin in oxidative  
324 stress-induced cellular responses. *Redox Rep*. doi:10.1179/135100001101536427
- 325 Nishiyama A, Matsui M, Iwata S, Hirota K, Masutani H, Nakamura H, Takagi Y, Sono H, Gon Y,  
326 Yodoi J. 1999. Identification of thioredoxin-binding protein-2/vitamin D(3) up-regulated protein  
327 1 as a negative regulator of thioredoxin function and expression. *J Biol Chem* **274**:21645–50.
- 328 Okawa H, Sampath AP, Laughlin SB, Fain GL. 2008. ATP consumption by mammalian rod  
329 photoreceptors in darkness and in light. *Curr Biol* **18**:1917–21. doi:10.1016/j.cub.2008.10.029
- 330 Patwari P, Chutkow WA, Cummings K, Verstraeten VLRM, Lammerding J, Schreier ER, Lee RT.  
331 2009. Thioredoxin-independent regulation of metabolism by the  $\alpha$ -arrestin proteins. *J Biol*  
332 *Chem* **284**:24996–25003. doi:10.1074/jbc.M109.018093
- 333 Picelli S, Björklund ÅK, Faridani OR, Sagasser S, Winberg G, Sandberg R. 2013. Smart-seq2 for  
334 sensitive full-length transcriptome profiling in single cells. *Nat Methods* **10**:1096–1098.  
335 doi:10.1038/nmeth.2639
- 336 Prusky GT, Alam NM, Beekman S, Douglas RM. 2004. Rapid quantification of adult and  
337 developing mouse spatial vision using a virtual optomotor system. *Investig Ophthalmol Vis Sci*



- 338 **45:4611–4616.** doi:10.1167/iov.04-0541
- 339 Puca L, Brou C. 2014.  $\alpha$ -Arrestins - new players in Notch and GPCR signaling pathways in  
340 mammals. *J Cell Sci*. doi:10.1242/jcs.142539
- 341 Punzo C, Kornacker K, Cepko CL. 2009. Stimulation of the insulin/mTOR pathway delays cone  
342 death in a mouse model of retinitis pigmentosa. *Nat Neurosci* **12**:44–52. doi:10.1038/nn.2234
- 343 Punzo C, Xiong W, Cepko CL. 2012. Loss of daylight vision in retinal degeneration: are oxidative  
344 stress and metabolic dysregulation to blame? *J Biol Chem* **287**:1642–8.  
345 doi:10.1074/jbc.R111.304428
- 346 Reers M, Smiley ST, Mottola-Hartshorn C, Chen A, Lin M, Chen LB. 1995. Mitochondrial  
347 membrane potential monitored by JC-1 dye. *Methods Enzymol* **260**:406–17.
- 348 Robinson C, Stringer S. 2001. The splice variants of vascular endothelial growth factor (VEGF)  
349 and their receptors - PubMed. *J Cell Sci* **114**:853–65.
- 350 Shekhar K, Lapan SW, Whitney IE, Tran NM, Macosko EZ, Kowalczyk M, Adiconis X, Levin JZ,  
351 Nemesh J, Goldman M, McCarroll SA, Cepko CL, Regev A, Sanes JR. 2016. Comprehensive  
352 Classification of Retinal Bipolar Neurons by Single-Cell Transcriptomics. *Cell* **166**:1308-  
353 1323.e30. doi:10.1016/j.cell.2016.07.054
- 354 Shriver LP, Manchester M. 2011. Inhibition of fatty acid metabolism ameliorates disease activity in  
355 an animal model of multiple sclerosis. *Sci Rep* **1**:79. doi:10.1038/srep00079
- 356 Swarup A, Samuels IS, Bell BA, Han JYS, Du J, Massenzio E, Abel ED, Boesze-Battaglia K,  
357 Peachey NS, Philp NJ. 2019. Modulating GLUT1 expression in retinal pigment epithelium  
358 decreases glucose levels in the retina: Impact on photoreceptors and müller glial cells. *Am J*  
359 *Physiol - Cell Physiol* **316**:C121–C133. doi:10.1152/ajpcell.00410.2018
- 360 Szczesny B, Brunyanszki A, Olah G, Mitra S, Szabo C. 2014. Opposing roles of mitochondrial and  
361 nuclear PARP1 in the regulation of mitochondrial and nuclear DNA integrity: Implications for  
362 the regulation of mitochondrial function. *Nucleic Acids Res* **42**:13161–13173.  
363 doi:10.1093/nar/gku1089
- 364 Tantama M, Hung YP, Yellen G. 2011. Imaging intracellular pH in live cells with a genetically  
365 encoded red fluorescent protein sensor. *J Am Chem Soc* **133**:10034–7.  
366 doi:10.1021/ja202902d
- 367 Tantama M, Martínez-François JR, Mongeon R, Yellen G. 2013. Imaging energy status in live cells  
368 with a fluorescent biosensor of the intracellular ATP-to-ADP ratio. *Nat Commun* **4**:2550.  
369 doi:10.1038/ncomms3550
- 370 Waldhart AN, Dykstra H, Peck AS, Boguslawski EA, Madaj ZB, Wen J, Veldkamp K, Hollowell M,  
371 Zheng B, Cantley LC, McGraw TE, Wu N. 2017. Phosphorylation of TXNIP by AKT Mediates  
372 Acute Influx of Glucose in Response to Insulin. *Cell Rep* **19**:2005–2013.  
373 doi:10.1016/j.celrep.2017.05.041
- 374 Wang S, Sengel C, Emerson MM, Cepko CL. 2014. A Gene Regulatory Network Controls the  
375 Binary Fate Decision of Rod and Bipolar Cells in the Vertebrate Retina. *Dev Cell* **30**:513–527.  
376 doi:10.1016/j.devcel.2014.07.018
- 377 Wang SK, Xue Y, Cepko CL. 2020. Microglia modulation by TGF- $\beta$ 1 protects cones in mouse  
378 models of retinal degeneration. *J Clin Invest* **140**:4360–4369. doi:10.1172/JCI136160
- 379 Wang SK, Xue Y, Rana P, Hong CM, Cepko CL. 2019. Soluble CX3CL1 gene therapy improves  
380 cone survival and function in mouse models of retinitis pigmentosa. *Proc Natl Acad Sci U S A*  
381 **116**:10140–10149. doi:10.1073/pnas.1901787116
- 382 Wang W, Lee SJ, Scott PA, Lu X, Emery D, Liu Y, Ezashi T, Roberts MR, Ross JW, Kaplan HJ,  
383 Dean DC. 2016. Two-Step Reactivation of Dormant Cones in Retinitis Pigmentosa. *Cell Rep*  
384 **15**:372–385. doi:10.1016/j.celrep.2016.03.022
- 385 Warburg O. 1925. The metabolism of carcinoma cells. *J Cancer Res* **9**:148–163.  
386 doi:10.1158/jcr.1925.148
- 387 Wellard J, Lee D, Valter K, Stone J. 2005. Photoreceptors in the rat retina are specifically  
388 vulnerable to both hypoxia and hyperoxia. *Vis Neurosci* **22**:501–507.  
389 doi:10.1017/S0952523805224112

- 390 Wu D, Ji X, Ivanchenko M, Chung M, Piper M, Wang S, Xue Y, Xu H, West E, Zhao S, Xiong W,  
391 Cepko C. n.d. Nrf2 overexpression rescues the RPE in mouse models of retinitis pigmentosa.  
392 *JCI Insight*.
- 393 Wu N, Zheng B, Shaywitz A, Dagon Y, Tower C, Bellinger G, Shen C-H, Wen J, Asara J, McGraw  
394 TE, Kahn BB, Cantley LC. 2013. AMPK-dependent degradation of TXNIP upon energy stress  
395 leads to enhanced glucose uptake via GLUT1. *Mol Cell* **49**:1167–75.  
396 doi:10.1016/j.molcel.2013.01.035
- 397 Xiong W, MacColl Garfinkel AE, Li Y, Benowitz LI, Cepko CL. 2015. NRF2 promotes neuronal  
398 survival in neurodegeneration and acute nerve damage. *J Clin Invest* **125**:1433–45.  
399 doi:10.1172/JCI79735
- 300 Xiong W, Wu DM, Xue Y, Wang SK, Chung MJ, Ji X, Rana P, Zhao SR, Mai S, Cepko CL. 2019.  
301 AAV cis-regulatory sequences are correlated with ocular toxicity. *Proc Natl Acad Sci U S A*  
302 **116**:5785–5794. doi:10.1073/pnas.1821000116
- 303 Ye GJ, Budzynski E, Sonnentag P, Nork TM, Sheibani N, Gurel Z, Boye SL, Peterson JJ, Boye  
304 SE, Hauswirth WW, Chulay JD. 2016. Cone-Specific Promoters for Gene Therapy of  
305 Achromatopsia and Other Retinal Diseases. *Hum Gene Ther* **27**:72–82.  
306 doi:10.1089/hum.2015.130
- 307 Zhang S, Xie C. 2017. The role of OXCT1 in the pathogenesis of cancer as a rate-limiting enzyme  
308 of ketone body metabolism. *Life Sci* **183**:110–115. doi:10.1016/j.lfs.2017.07.003
- 309 Zhao L, Zabel MK, Wang X, Ma W, Shah P, Fariss RN, Qian H, Parkhurst CN, Gan W, Wong WT.  
310 2015. Microglial phagocytosis of living photoreceptors contributes to inherited retinal  
311 degeneration. *EMBO Mol Med* **7**:1179–1197. doi:10.15252/emmm.201505298  
312  
313



314 **Acknowledgements**

315 We thank Sui Wang, ChangHee Lee, Sylvain Lapan, Gabby Niconchuk, Brian Rabe, Cem Sengel,  
316 Sophia Zhao, Yuji Atsuta, Wenjun Xiong, Ryoji Amamoto, Grace Wallick, Gary Yellen, Zhongjie  
317 Fu, Zhengping Hu, Maryna Ivanchenko, Paula Montero-Llopis, Microscopy Resources on the  
318 North Quad, Maria Ericsson, Electron Microscopy Facility, Flow Cytometry of Immunology,  
319 Marcelo Cicconet, Image and Data Analysis Core of Harvard Medical School, Genomics Platform  
320 of Broad Institute, Metabolomics Core Resource Laboratory of New York University, Frans Vinberg  
321 at University of Utah for discussions and technical support. We also thank Botond Roska, Jacob  
322 Keller, Loren Looger, Leah Byrne, John Flannery, William Hahn, David Root, Lewis Cantley,  
323 Matthew Vander Heiden, Geoff Wahl, Michael Davidson, Clark Distelhorst, Bong-Kiun Kaang and  
324 Thorsten Mascher for plasmids. This work was funded by National Institute of Health  
325 (K99EY030951 to Y.X. and U01EY025497 to C.L.C.), Alcon Research Institute (C.L.C.), Astellas  
326 Pharmaceuticals (C.L.C.), and Howard Hughes Medical Institute (C.L.C.).  
327  
328  
329  
330  
331

332 **Author contributions**

333 Y.X. and C.L.C. designed the study and wrote the manuscript with input from other authors. Y.X.,  
334 S.K.W. and P.R. performed the experiments. Y.X., S.K.W., P.R., E.R.W., C.M.H. and H.F.  
335 analyzed the data. D.M.W provided critical software and reagents to this study.  
336  
337  
338  
339

340 **Fig. 1: Txnip enhances cone survival and delays the deterioration of cone-mediated vision**  
341 **in RP mice.**

342 **a.** Representative images from P20 and P50 *rd1*, P130 *rd10* and P150 *rho*<sup>-/-</sup> flat-mounted retinas,  
343 in which cones are labeled with H2BGFP, treated with Txnip or control (i.e. H2BGFP and vehicle  
344 only, same applies to all other figures). The outer circle was drawn to mark the full extent of the  
345 retina, and the inner circle was drawn by using half of the radius of the outer circle. The small box  
346 in the top four panels are zoomed in with pixels recognized as cones by a MATLAB automated-  
347 counting program (Extended Data Fig.1c). The number at lower right corner is the count of cells  
348 within the half radius of each image (same applies to all other figures).

349 **b.** Quantification of H2BGFP-positive cones within the inner half of the retina at different groups.  
350 Error bar: standard deviation.

351 The number in round brackets “( )” indicates the sample size, i.e. the number of eyes/retinas within  
352 each group (same applies to all other figures).

353 **c.** Visual acuity of *rd10* and P140 *rho*<sup>-/-</sup> mice with Txnip or control treatment in each eye measured  
354 with optomotor assays. Error bar: SEM.

355 NS: not significant,  $p > 0.05$ . \*  $p < 0.05$ . \*\*  $p < 0.01$ . \*\*\*  $p < 0.001$ . \*\*\*\*  $p < \text{or } \ll 0.0001$ .

356  
357

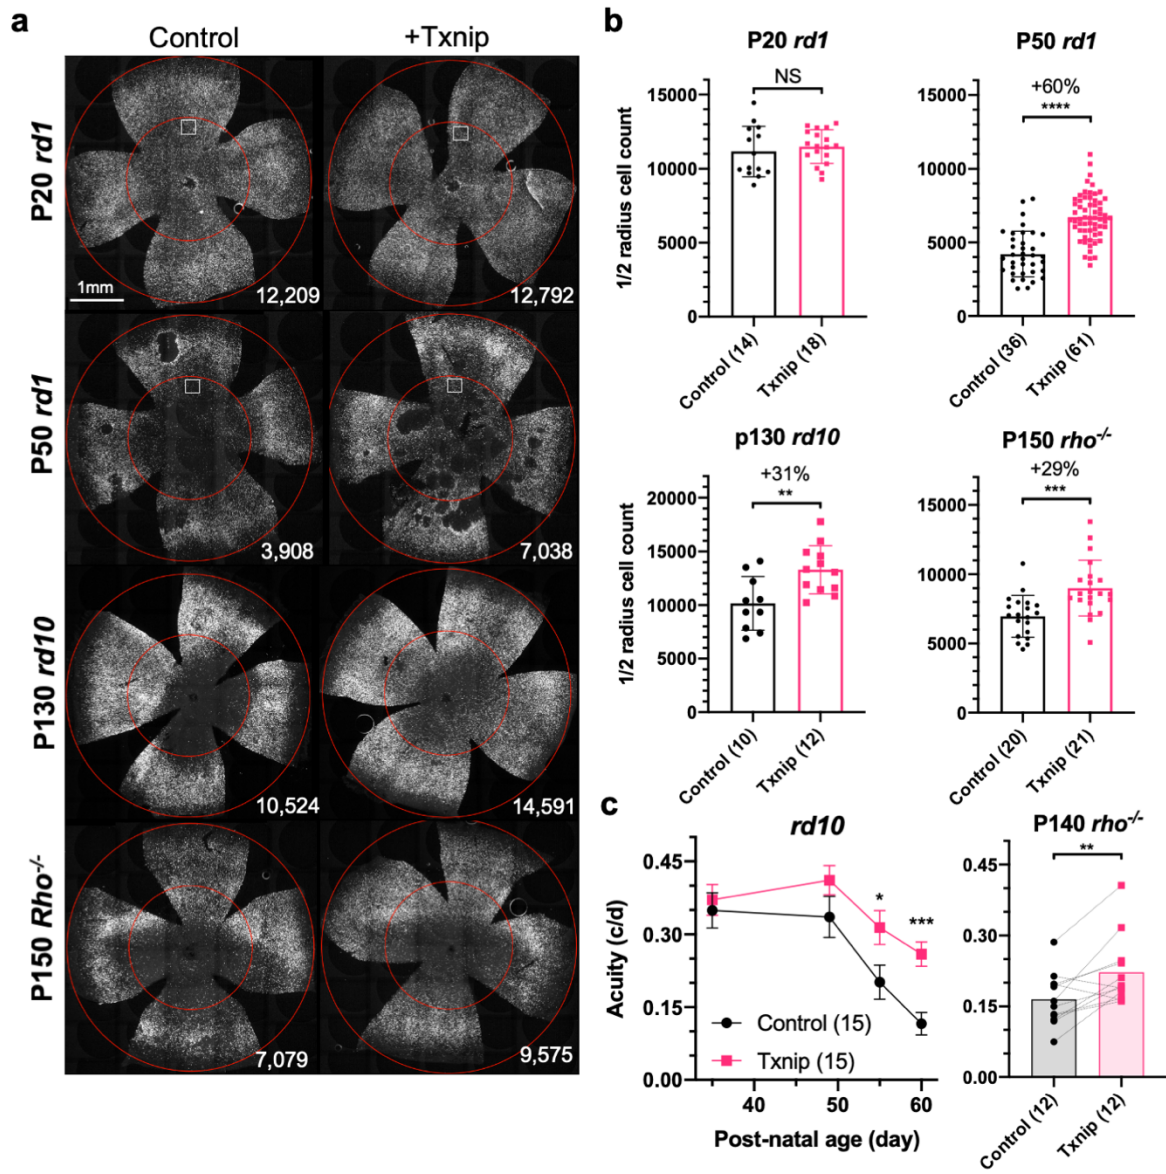

360  
361  
362  
363  
364  
365  
366  
367  
368

**Fig. 2: Test of Txnip alleles on cone survival**

- a.** Representative P50 *rd1* flat-mounted retinas with H2BGFP (gray) labeled cones treated with one of four different Txnip alleles.
- b.** Quantification of H2BGFP-positive cones within the half radius of P50 *rd1* retinas treated with wildtype (wt) Txnip, Txnip alleles, and control. Error bar: standard deviation. Abbreviations: Txnip.CS.SA = Txnip.C247S.S308A; Txnip.CS.LLAA = Txnip.C247S.LL351&352AA. NS: not significant,  $p > 0.05$ . \*  $p < 0.05$ . \*\*  $p < 0.01$ . \*\*\*  $p < 0.001$ . \*\*\*\*  $p < \text{or } \ll 0.0001$ .





371 **Fig. 3: Ldhb is necessary for Txnip-induced rescue of RP cones *in vivo*.**  
372 **a.** Representative P50 *rd1* flat-mounted retinas with H2BGFP (gray) labeled cones treated with  
373 siNC (non-targeting scrambled control shRNA), siLdhb<sup>(#2)</sup> (Ldhb shRNA), Txnip + siNC, or Txnip +  
374 siLdhb<sup>(#2)</sup>.  
375 **b.** Quantification of H2BGFP-positive cones within the half radius of P50 *rd1* retinas treated with  
376 control, siNC control, Txnip + siLdhb<sup>(#2)</sup> or siNC control.  
377 **c.** Quantification of H2BGFP-positive cones within the half radius of P50 *rd1* retinas treated with  
378 Txnip + siOxct1<sup>(#c)</sup>, Txnip + siCpt1a<sup>(#c)</sup>, Txnip + siOxct1<sup>(#c)</sup> + siCpt1a<sup>(#c)</sup>, or siNC control.  
379 Error bar: standard deviation. NS: not significant,  $p > 0.05$ . \*\*  $p < 0.01$ . \*\*\*  $p < 0.001$ . \*\*\*\*  $p < 0.0001$ .  
380  
381  
382  
383

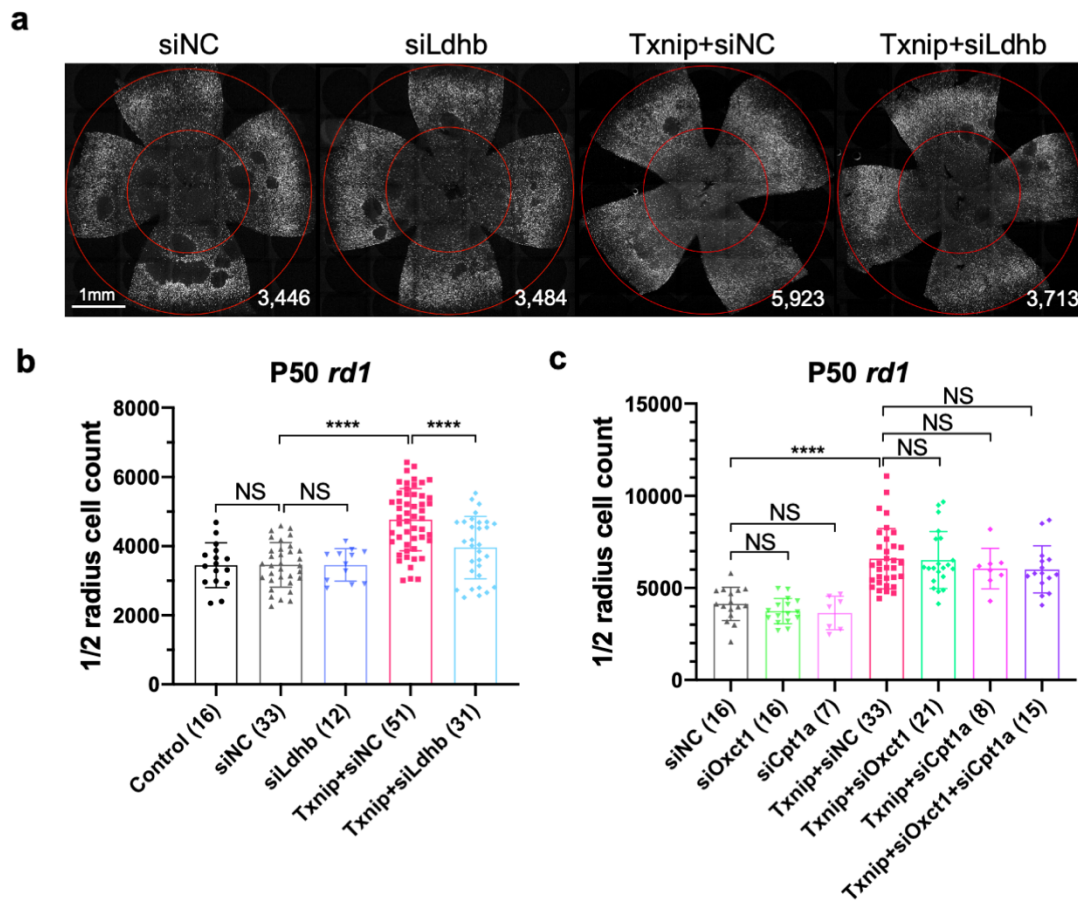

386

387

**Fig. 4: Txnip increases ATP:ADP levels in RP cones in lactate medium.**

388

**a.** Representative *ex vivo* live images of PercevalHR labeled cones in P20 *rd1* retinas cultured with high-glucose, lactate-only, or pyruvate-only medium and treated with Txnip or control.

389

(Magenta: fluorescence by 405 nm excitation, indicating low-ATP:ADP. Green: fluorescence by 488 nm excitation, indicating high-ATP:ADP.)

390

391

**b.** Quantification of normalized PercevalHR fluorescence intensity ratio ( $F_{\text{PercevalHR}^{\text{ex488nm}} : \text{ex405nm}}$ , proportional to ATP:ADP ratio) in cones from P20 *rd1* retinas in different conditions.

392

393

The number in the bracket “[ ]” indicates the sample size, i.e. the number of images taken from regions of interest of multiple retinas ( $\approx 3$  images per retina), in each condition (same applies to all other figures).

394

395

396

**c.** Quantification of normalized PercevalHR fluorescence intensity of Txnip + siLdhd<sup>(#2)</sup> and Txnip + siNC in cones from P20 *rd1* retina in lactate-only or pyruvate-only medium.

397

398

**d.** Representative *ex vivo* live images of PercevalHR labeled cones in P20 *rd1* retinas cultured in lactate-only medium, following treatment with Txnip.C247S or Txnip.S308A. (Magenta:

399

400

fluorescence by 405 nm excitation, indicating low-ATP:ADP. Green: fluorescence by 488 nm excitation, indicating high-ATP:ADP.)

401

402

**e.** Quantification of normalized PercevalHR fluorescence intensity following treatment by Txnip, Txnip alleles, and control cones in P20 *rd1* retinas cultured in lactate-only medium. Abbreviations: Txnip.CS = Txnip.C247S; Txnip.SA = Txnip.S308A.

403

404

405

Error bar: standard deviation. NS: not significant,  $p > 0.05$ . \*\*  $p < 0.01$ . \*\*\*  $p < 0.001$ . \*\*\*\*  $p < 0.0001$ .

406

407

408

409

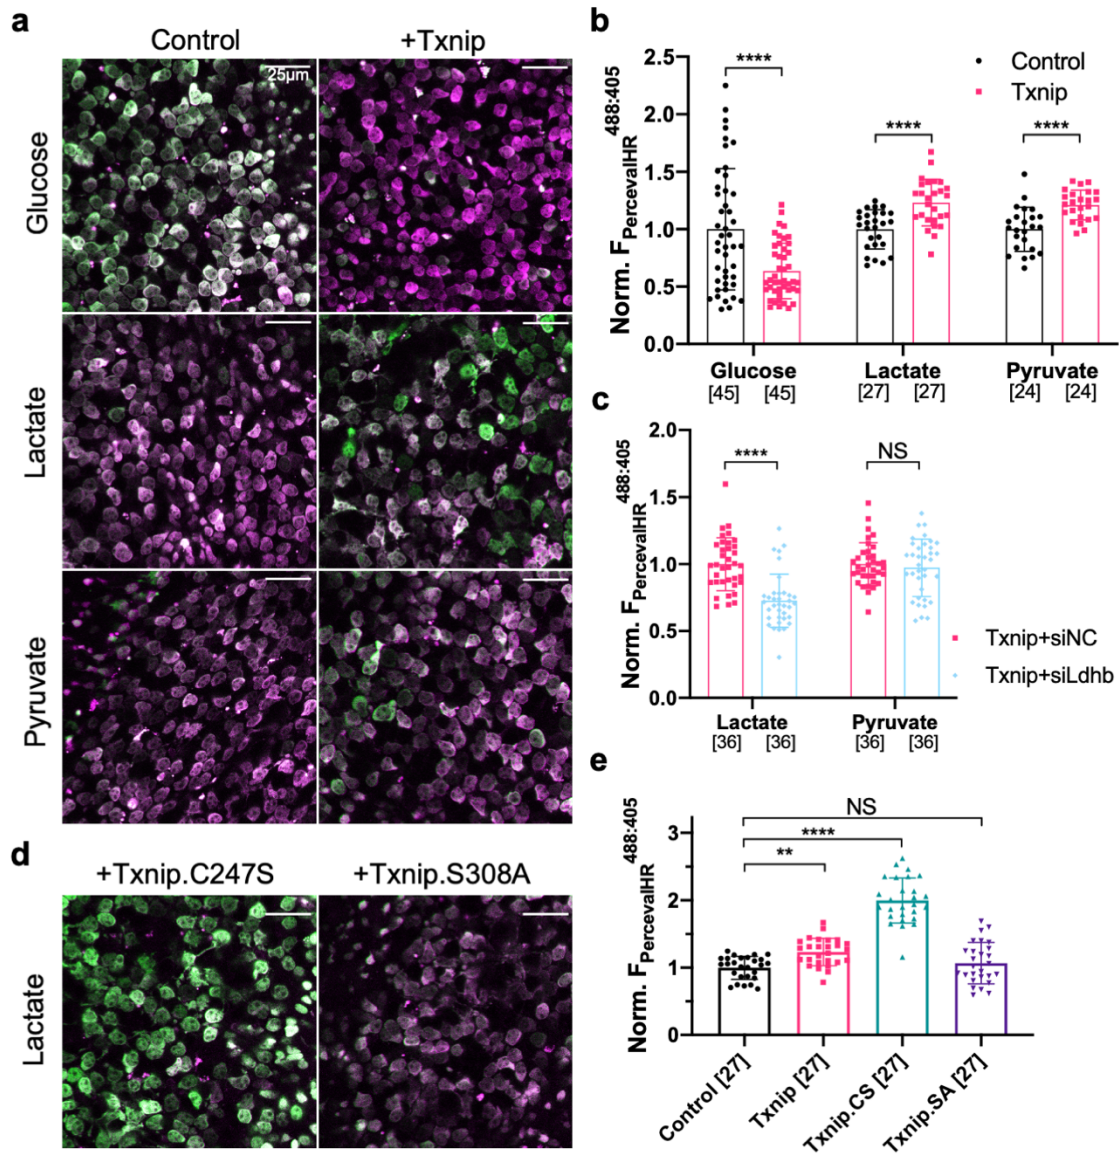



012

013 **Fig. 5: Txnip enhances RP cone mitochondrial size and function**

014 **a.** Representative EM images of RP cones from P20 *rd1* cones treated with Txnip, Txnip.C247S,  
015 Txnip.S308A, and control.

016 **b.** Quantification of mitochondrial diameters from control, Txnip, Txnip.C247S and Txnip.S308A  
017 treated cones.

018 The number in the curly bracket “{ }” indicates the sample size, i.e. the number of mitochondria  
019 from multiple cones of  $\geq$  one retina for each condition (5 retinas for control, 4 for Txnip, 2 for  
020 Txnip.C247S, and 1 for Txnip.S308A).

021 **c.** Images of JC-1 dye staining (indicator of ETC function) in live cones of P20 *rd1* central retina at  
022 different conditions. (Magenta: J-aggregate, indicating high ETC function. Green: JC-1 monomer,  
023 for self-normalization. H2BGFP channel, the tracer of AAV infected area, is not shown.)

024 **d.** Quantification of normalized cone JC-1 dye staining (fluorescence intensity of J-aggregate:JC-1  
025 monomer) from live cones in P20 *rd1* retinas in different conditions (3 - 4 images per retina).

026 **e.** Images of mitoRFP staining (reflecting mitochondrial function) in Txnip.C247S and control  
027 cones from fixed P20 *parp1<sup>+/+</sup> rd1* and *parp1<sup>-/-</sup> rd1* retinas near the optic nerve head. (Magenta:  
028 mitoRFP. Gray: H2BGFP, for mitoRFP normalization.)

029 **f.** Quantification of normalized mito-RFP:H2BGFP intensity in different conditions of P20 *parp1 rd1*  
030 retinas (4 images per retina, near optical nerve head).

031 **g.** Images of P50 *parp1<sup>+/+</sup> rd1* and *parp1<sup>-/-</sup> rd1* retinas with H2BGFP (gray) labeled cones treated  
032 with Txnip.C247S or control. *Rd1* cone degeneration seems to be faster after being crossed to  
033 *parp1* mice (on 129S background) due to unknown reason(s). Please enlarge the images to  
034 appreciate the improved cone counts near the inner circle.

035 **h.** Quantification of H2BGFP-positive cones within the half radius of P50 *parp1<sup>+/+</sup> rd1* and *parp1<sup>-/-</sup>*  
036 *rd1* retinas treated with Txnip.C247S or control.

037 **i.** Images of P50 *parp1<sup>-/-</sup> rd1* retinas with H2BGFP (gray) labeled cones treated with Ldhb or  
038 H2BGFP only.

039 **j.** Quantification of H2BGFP-positive cones within the half radius of P50 *parp1<sup>-/-</sup> rd1* retinas treated  
040 with Ldhb or H2BGFP only.

041 Error bar: standard deviation. NS: not significant,  $p > 0.05$ . \*  $p < 0.05$ . \*\*  $p < 0.01$ . \*\*\*  $p < 0.001$ .

042 \*\*\*\*  $p < \text{or} << 0.0001$ . Abbreviations: Txnip.SA = Txnip; Txnip.SA = Txnip.S308A.

043

044

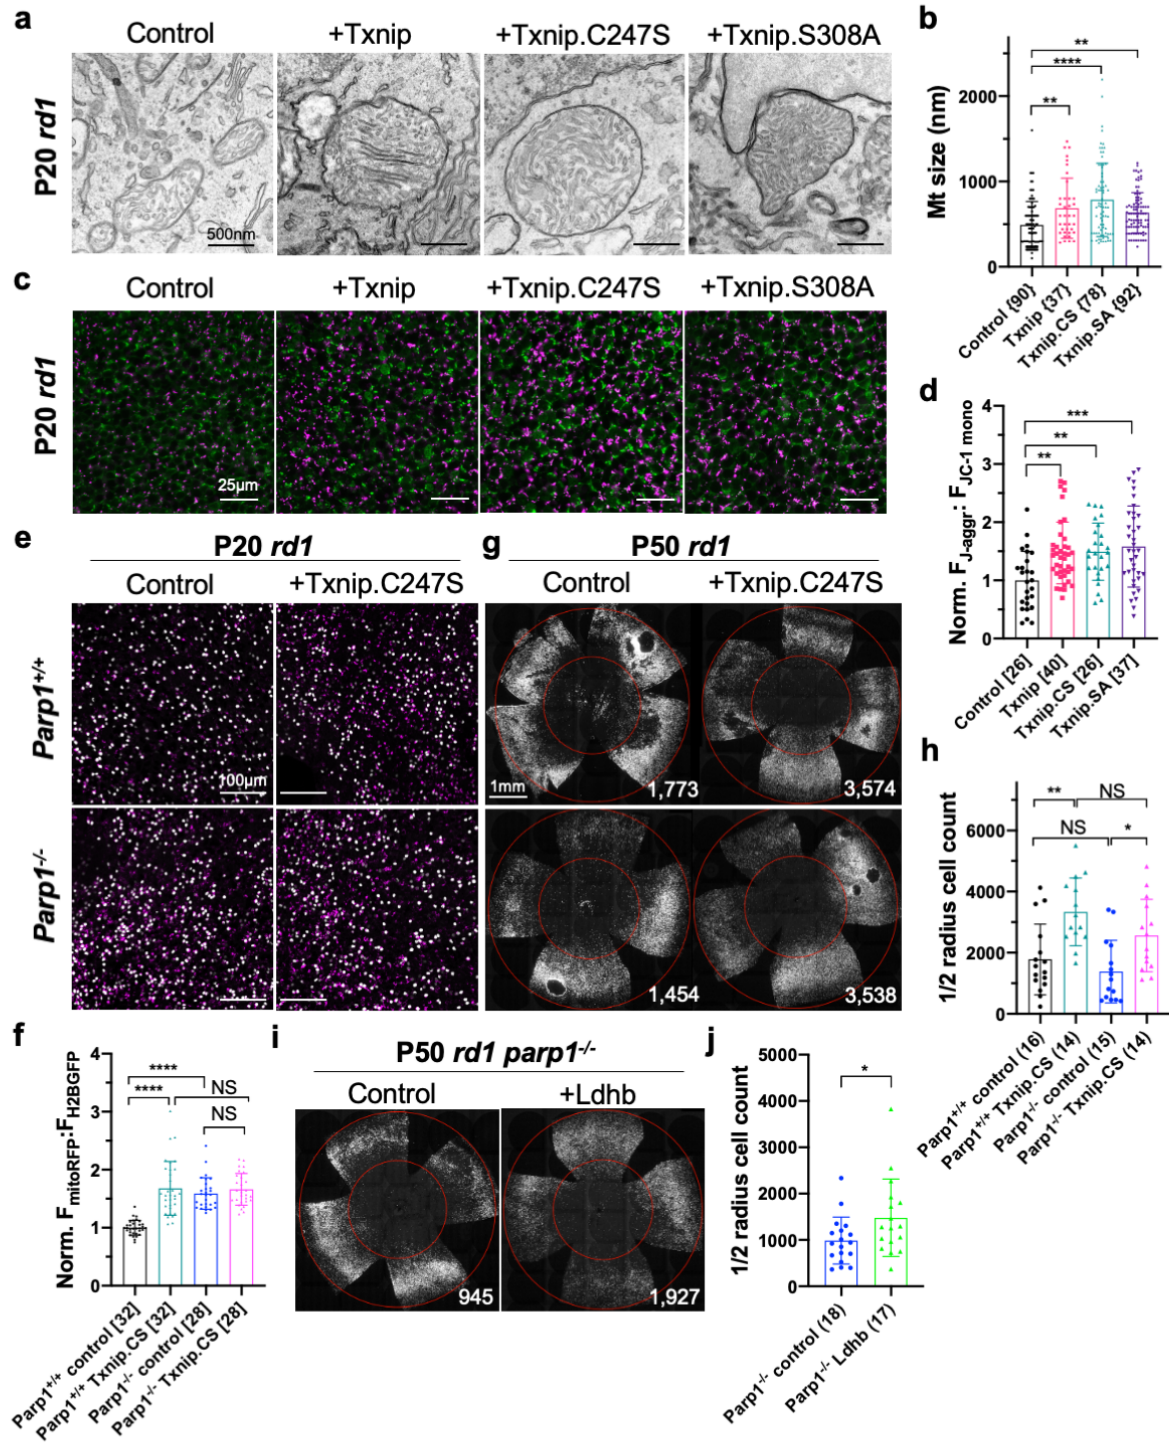

Fig. 5

047 **Fig. 6: Txnip enhances Na<sup>+</sup>/K<sup>+</sup> ATPase pump function and cone opsin expression in RP**  
048 **cones.**

049 **a.** Images of live *ex vivo* RH421 stained cones in P20 *rd1* retinas treated with Txnip.C247S or  
050 control and cultured in lactate-only medium. (Magenta: RH421 fluorescence, proportional to  
051 Na<sup>+</sup>/K<sup>+</sup> ATPase function. Gray: H2BGFP, tracer of infection).

052 **b.** Quantification of normalized RH421 fluorescence intensity from Txnip.C247S treated cones  
053 relative to control in P20 *rd1* retinas cultured in lactate-only medium (5 images per retina).  
054 Abbreviation: Txnip.CS = Txnip.C247S.

055 **c.** IHC with anti-s-opsin plus anti-m-opsin antibodies near the half radius of P50 *rd1* retinas treated  
056 with Txnip.C247S or control. (Green: cone-opsins. Gray: H2BGFP, tracer of infection).  
057 Error bar: standard deviation. \*\*\*\*  $p < \text{or} \ll 0.0001$ .

058  
059

060

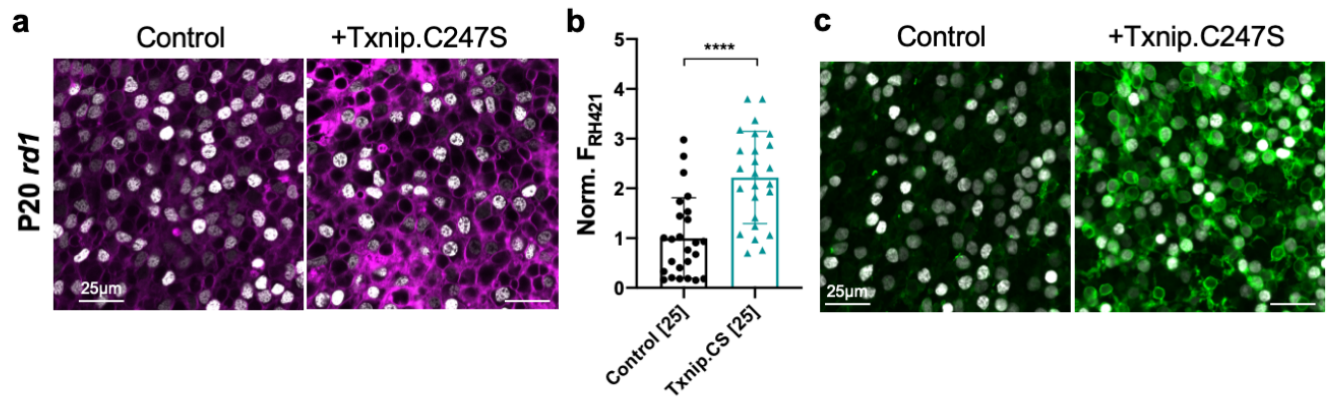

061  
062

**Fig. 6**



063 **Fig. 7: Dominant negative HIF1 $\alpha$  and Best1-Txnip.C247S.LL351&352AA enhance RP cone**  
064 **survival.**  
065 **a.** Images of P50 *rd1* retinas with H2BGFP (gray) labeled cones treated with dnHIF1 $\alpha$ , Hif1a,  
066 Best1-Txnip.C247S.LL351&352AA (Txnip.CS.LLAA, driven by an RPE-specific promoter) or  
067 control. Note that Best1-Txnip.C247S.LL351&352AA amplified the FVB-specific retinal craters,  
068 while dnHIF1 $\alpha$  decreased them.  
069 **b.** Quantification of H2BGFP-positive cones within the half radius of P50 *rd1* retinas treated with  
070 dnHIF1 $\alpha$ , Hif1a, Best1-Txnip.C247S.LL351&352AA or control. Abbreviation: B-Tx.CS.LLAA =  
071 Best1-Txnip.C247S.LL351&352AA.  
072 Error bar: standard deviation. \*  $p < 0.05$ . \*\*  $p < 0.01$ . \*\*\*  $p < 0.001$ .  
073  
074

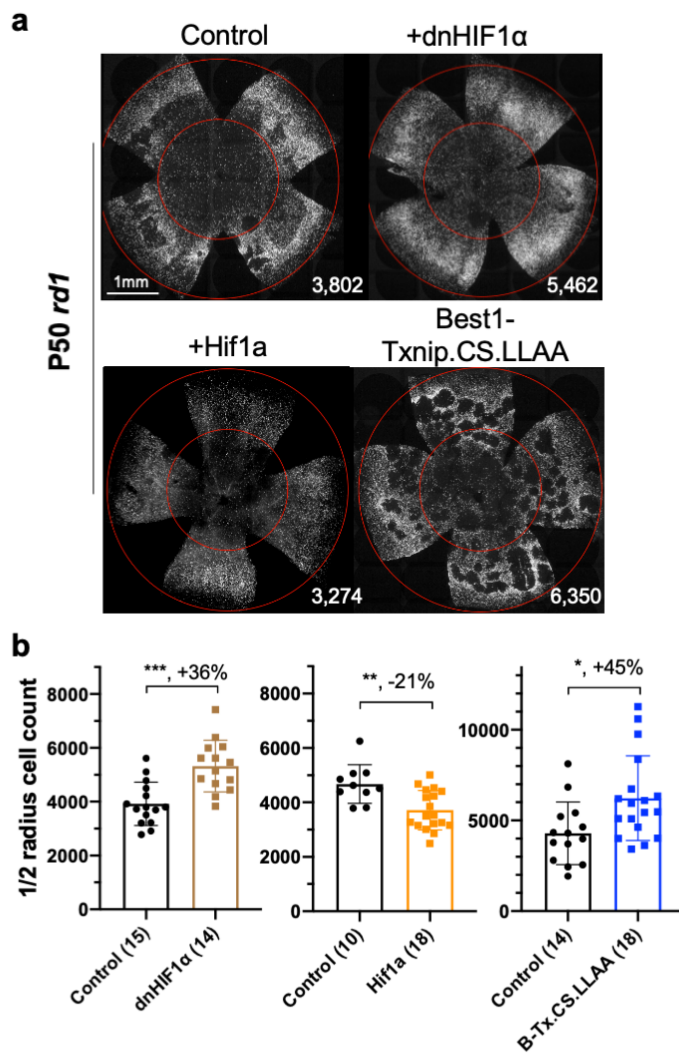

076 **Fig. 8: Combination of Txnip.C247S with Best1-Nrf2 or Tgfb1 provides an additive effect.**  
077 **a.** Images of P50 *rd1* retinas with H2BGFP (gray) labeled cones treated with Txnip.C247S or  
078 Txnip.C247S + Best1-Nrf2.  
079 **b.** Quantification of H2BGFP-positive cones within the half radius of P50 *rd1* retinas treated with  
080 Txnip.C247S or Txnip.C247S + Best1-Nrf2. Abbreviation: B-Nrf2 = Best1-Nrf2.  
081 **c.** IHC with anti-s-opsin plus anti-m-opsin antibodies near the half radius of P130 *rd10* retinas  
082 treated with Txnip.C247S (left panel) or Txnip.C247S + Best1-Nrf2 (right panel). (Green: cone-  
083 opsins. Gray: H2BGFP, tracer of infection).  
084 **d.** Images of P50 *rd1* retinas with H2BGFP (gray) labeled cones treated with Txnip.C247S or  
085 Txnip.C247S + Tgfb1.  
086 **e.** Quantification of H2BGFP-labeled cones within the half radius of P50 *rd1* retinas treated with  
087 control, Tgfb1, Txnip.C247S, or Txnip.C247S + Tgfb1.  
088 Error bar: standard deviation. NS: not significant,  $p > 0.05$ . \*  $p < 0.05$ . \*\*  $p < 0.01$ .  
089

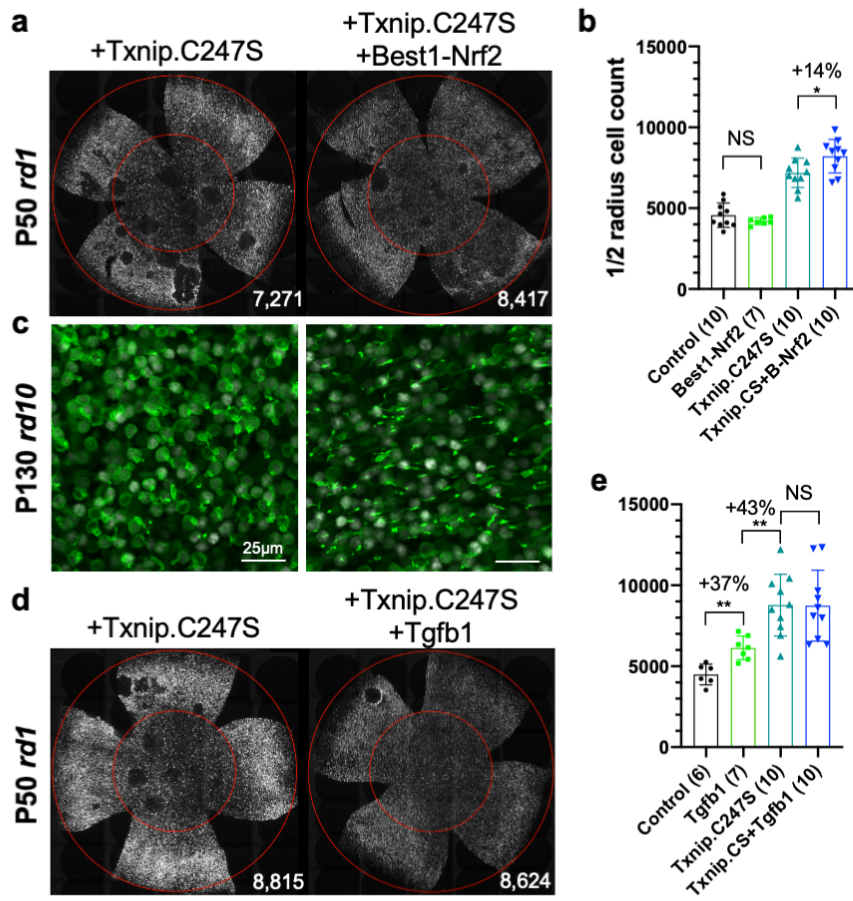



991 **Supplementary Table 1: AAV8 vectors used in this study.**

| Inserts                          | Insert species | Promoter       | Intron                | WPRE  | poly(A)   | ITR-to-ITR size | Digestion (XmaI, ITR) | Partial seq (ligation site) | Complete plasmid seq | AAV genome seq | Efficacy | Raw data |
|----------------------------------|----------------|----------------|-----------------------|-------|-----------|-----------------|-----------------------|-----------------------------|----------------------|----------------|----------|----------|
| H2BGFP                           | N/A            | RedO (default) | N/A                   | WPRE  | Bovine GH | 4.4 kb          | Correct               | Correct                     | -                    | -              | N/A      | -        |
| H2BGFP                           | N/A            | SynP136        | N/A                   | WPRE3 | SV40-Late | 3.9 kb          | Correct               | Correct                     | -                    | -              | N/A      | -        |
| mitoRFP                          | N/A            | SynP136        | N/A                   | WPRE3 | SV40-Late | 3.5 kb          | Correct               | Correct                     | Correct              | -              | N/A      | -        |
| Txnip                            | Mouse          | RedO (default) | N/A                   | WPRE  | Bovine GH | 4.5kb           | Correct               | Correct                     | Correct              | -              | Pos      | Fig. 1   |
| Txnip                            | Mouse          | SynPVI         | N/A                   | WPRE3 | SV40-Late | 2.4kb           | Correct               | Correct                     | -                    | -              | Pos      | Fig. S1  |
| Txnip                            | Mouse          | Best1          | SV40                  | WPRE  | Bovine GH | 3.1 kb          | Correct               | Correct                     | -                    | -              | Neg      | Fig. S6  |
| Txnip.C247S                      | Mouse          | RedO           | N/A                   | WPRE  | Bovine GH | 4.5kb           | Correct               | Correct                     | Correct              | Correct        | Pos      | Fig. 2   |
| Txnip.S308A                      | Mouse          | RedO           | N/A                   | WPRE  | Bovine GH | 4.5kb           | Correct               | Correct                     | Correct              | Correct        | Neg      | Fig. 2   |
| Txnip.C247S.S308A                | Mouse          | RedO           | N/A                   | WPRE  | Bovine GH | 4.5kb           | Correct               | Correct                     | Correct              | -              | Neg      | Fig. 2   |
| Txnip.C247S.LL351&352AA          | Mouse          | RedO           | N/A                   | WPRE  | Bovine GH | 4.5kb           | Correct               | Correct                     | Correct              | -              | Pos      | Fig. 2   |
| Txnip.C247S.LL351&352AA          | Mouse          | Best1          | SV40                  | WPRE  | Bovine GH | 3.1 kb          | Correct               | Correct                     | Correct              | -              | Pos      | Fig. 7   |
| GFP-Txnip                        | Mouse          | RO1.7          | N/A                   | WPRE3 | SV40-Late | 4.4 kb          | Correct               | Correct                     | Correct              | -              | N/A      | -        |
| Nrf2                             | Human          | CMV            | human $\beta$ -globin | N/A   | SV40      | 3.7 kb          | -                     | -                           | -                    | -              | Pos      | Fig. S1  |
| Nrf2                             | Human          | SynPVI         | N/A                   | WPRE3 | SV40-Late | 3.1 kb          | Correct               | Correct                     | Correct              | -              | Neg      | Fig. S6  |
| Nrf2                             | Human          | Best1          | SV40                  | WPRE  | Bovine GH | 3.8 kb          | Correct               | Correct                     | -                    | -              | Neg      | Fig. 8   |
| Cx3cl1                           | Mouse          | Best1          | SV40                  | WPRE  | Bovine GH | 3.0 kb          | -                     | Correct                     | Correct              | -              | Pos      | Fig. S6  |
| Cx3cl1                           | Mouse          | RedO           | N/A                   | WPRE  | Bovine GH | 4.3 kb          | -                     | Correct                     | -                    | -              | Neg      | Fig. S6  |
| Tgfb1                            | Mouse          | RedO           | N/A                   | WPRE  | Bovine GH | 4.4 kb          | -                     | Correct                     | -                    | -              | Pos      | Fig. 8   |
| dnHIF1 $\alpha$                  | Mouse          | RO1.7          | N/A                   | WPRE3 | SV40-Late | 3.6 kb          | Correct               | Correct                     | Correct              | -              | Pos      | Fig. 7   |
| dnHIF1 $\alpha$                  | Mouse          | Best1          | SV40                  | WPRE  | Bovine GH | 3.1 kb          | Correct               | Correct                     | Correct              | -              | Neg      | Fig. S6  |
| Hif1 $\alpha$                    | Mouse          | SynPVI         | N/A                   | WPRE3 | SV40-Late | 3.8 kb          | Correct               | Correct                     | Correct              | -              | Neg      | Fig. 7   |
| Hk1                              | Human          | SynPVI         | N/A                   | WPRE3 | SV40-Late | 4.0 kb          | Correct               | Correct                     | -                    | -              | Neg      | Fig. S1  |
| Hk2                              | Mouse          | SynPVI         | N/A                   | WPRE3 | SV40-Late | 4.0 kb          | Correct               | Correct                     | -                    | -              | Neg      | Fig. S1  |
| Pfkm                             | Human          | SynPVI         | N/A                   | WPRE3 | SV40-Late | 3.6 kb          | Correct               | Correct                     | -                    | -              | Neg      | Fig. S1  |
| Pkm1                             | Human          | SynPVI         | N/A                   | WPRE3 | SV40-Late | 2.8 kb          | Correct               | Correct                     | -                    | -              | Neg      | Fig. S1  |
| Pkm2                             | Human          | SynPVI         | N/A                   | WPRE3 | SV40-Late | 2.8 kb          | Correct               | Correct                     | -                    | -              | Neg      | Fig. S1  |
| Ldha                             | Mouse          | RO1.7          | N/A                   | WPRE3 | SV40-Late | 3.6 kb          | Correct               | Correct                     | Correct              | -              | Neg      | Fig. S1  |
| Ldhb                             | Mouse          | RedO           | N/A                   | WPRE  | Bovine GH | 4.3 kb          | Correct               | Correct                     | Correct              | -              | Neg      | Fig. S6  |
| Ldhb-3xFLAG                      | Mouse          | RO1.7          | N/A                   | WPRE3 | SV40-Late | 3.6 kb          | Correct               | Correct                     | Correct              | -              | N/A      | -        |
| Sic2a1                           | Mouse          | RO1.7          | N/A                   | WPRE3 | SV40-Late | 4.0 kb          | Correct               | Correct                     | Correct              | -              | Neg      | Fig. S1  |
| Bsg1                             | Mouse          | RedO           | N/A                   | WPRE  | Bovine GH | 4.4 kb          | Correct               | Correct                     | -                    | -              | Neg      | Fig. S1  |
| RdCVF                            | Mouse          | RedO           | N/A                   | WPRE  | Bovine GH | 3.6 kb          | Correct               | Correct                     | -                    | -              | Neg      | Fig. S1  |
| RdCVF                            | Mouse          | Best1          | SV40                  | WPRE  | Bovine GH | 2.3 kb          | Correct               | Correct                     | -                    | -              | Neg      | Fig. S6  |
| Cpt1a                            | Mouse          | RedO           | N/A                   | WPRE  | Bovine GH | 5.6 kb          | Correct               | Correct                     | Correct              | -              | Neg      | Fig. S1  |
| Oxct1                            | Mouse          | RedO           | N/A                   | WPRE  | Bovine GH | 4.8 kb          | Correct               | Correct                     | Correct              | -              | Neg      | Fig. S1  |
| Mpc1                             | Mouse          | RO1.7          | N/A                   | WPRE3 | SV40-Late | 3.0 kb          | Correct               | Correct                     | -                    | -              | Neg      | Fig. S6  |
| Mpc2                             | Mouse          | RO1.7          | N/A                   | WPRE3 | SV40-Late | 2.9 kb          | Correct               | Correct                     | -                    | -              | Neg      | Fig. S6  |
| Vegf164                          | Mouse          | RO1.7          | N/A                   | WPRE3 | SV40-Late | 3.1 kb          | Correct               | Correct                     | Correct              | -              | Neg      | Fig. S6  |
| PercevalHR                       | N/A            | RO1.7          | N/A                   | WPRE3 | SV40-Late | 4.2 kb          | Correct               | Correct                     | Correct              | -              | N/A      | -        |
| iGlucSnFR                        | N/A            | SynPVI         | N/A                   | WPRE3 | SV40-Late | 4.0 kb          | Correct               | Correct                     | Correct              | -              | N/A      | -        |
| pHRed                            | N/A            | SynP136        | N/A                   | WPRE3 | SV40-Late | 3.5 kb          | Correct               | Correct                     | Correct              | -              | N/A      | -        |
| siNC                             | N/A            | RedO           | N/A                   | WPRE  | Bovine GH | 3.3 kb          | Correct               | Correct                     | Correct              | -              | Neg      | Fig. 3   |
| siLdhd <sup>(#2)</sup> (default) | Mouse          | RedO           | N/A                   | WPRE  | Bovine GH | 3.3 kb          | Correct               | Correct                     | Correct              | -              | Neg      | Fig. 3   |
| siLdhd <sup>(#1)</sup>           | Mouse          | RedO           | N/A                   | WPRE  | Bovine GH | 3.3 kb          | Correct               | Correct                     | Correct              | -              | -        | -        |
| siLdhd <sup>(#3)</sup>           | Mouse          | RedO           | N/A                   | WPRE  | Bovine GH | 3.3 kb          | Correct               | Correct                     | Correct              | -              | -        | -        |
| siOxct1                          | Mouse          | RedO           | N/A                   | WPRE  | Bovine GH | 3.3 kb          | Correct               | Correct                     | Correct              | -              | Neg      | Fig. 3   |
| siCpt1a                          | Mouse          | RedO           | N/A                   | WPRE  | Bovine GH | 3.3 kb          | Correct               | Correct                     | Correct              | -              | Neg      | Fig. 3   |
| siSic2a1                         | Mouse          | RedO           | N/A                   | WPRE  | Bovine GH | 3.3 kb          | Correct               | Correct                     | Correct              | -              | Neg      | Fig. S2  |

093  
094

**Supplementary Table 2: Differentially expressed genes in common between *rd1* and *rho*<sup>-/-</sup> cones infected by AAV-Txnip.**

| MGI symbol     | P90 <i>rho</i> <sup>-/-</sup> |                 |             |                  | P21 <i>rd1</i> |                 |             |                  |
|----------------|-------------------------------|-----------------|-------------|------------------|----------------|-----------------|-------------|------------------|
|                | Base Mean                     | log2Fold Change | log2Fold SE | Adjusted p-value | Base Mean      | log2Fold Change | log2Fold SE | Adjusted p-value |
| <b>Txnip</b>   | 1324.3                        | 10.211          | 0.516       | 4.78E-83         | 582.4          | 9.325           | 0.775       | 2.17E-29         |
| <b>mt-Cytb</b> | 13643.7                       | 1.248           | 0.257       | 0.00079349       | 5651.4         | 0.384           | 0.082       | 0.00014272       |
| <b>mt-Nd4</b>  | 3118.0                        | 1.195           | 0.212       | 3.52E-05         | 1504.6         | 0.392           | 0.076       | 1.76E-05         |
| <b>Vax2os</b>  | 67.2                          | 1.028           | 0.323       | 0.04091883       | 33.6           | 0.932           | 0.321       | 0.04383248       |
| <b>mt-Co1</b>  | 9876.4                        | 0.808           | 0.189       | 0.00393386       | 5235.1         | 0.388           | 0.075       | 1.7625E-05       |
| <b>Rom1</b>    | 5040.6                        | 0.748           | 0.190       | 0.00789643       | 4432.7         | 0.164           | 0.056       | 0.04435279       |
| <b>Cd63</b>    | 488.9                         | 0.717           | 0.233       | 0.04957176       | 249.8          | 0.370           | 0.110       | 0.01303008       |
| <b>Ftl1</b>    | 799.9                         | 0.657           | 0.212       | 0.04701416       | 934.6          | 0.252           | 0.081       | 0.02671713       |
| <b>Utp14b</b>  | 51.1                          | -2.486          | 0.586       | 0.00406139       | 60.1           | -1.679          | 0.246       | 2.9705E-09       |
| <b>Slc9a7</b>  | 52.9                          | -1.993          | 0.494       | 0.00646284       | 45.3           | -1.047          | 0.278       | 0.00408081       |
| <b>Megf9</b>   | 369.0                         | -1.752          | 0.529       | 0.03204053       | 417.7          | -0.666          | 0.173       | 0.00313404       |
| <b>Mgat2</b>   | 33.4                          | -1.572          | 0.434       | 0.01699743       | 36.7           | -1.343          | 0.343       | 0.00251377       |
| <b>Rnf168</b>  | 40.0                          | -1.508          | 0.476       | 0.04171633       | 45.7           | -0.970          | 0.275       | 0.00857761       |
| <b>Mid1</b>    | 60.9                          | -1.478          | 0.395       | 0.0126336        | 213.7          | -0.995          | 0.198       | 3.5144E-05       |
| <b>Ptprn2</b>  | 333.4                         | -1.461          | 0.358       | 0.00598384       | 45.8           | -0.994          | 0.309       | 0.01998408       |
| <b>Ankle2</b>  | 115.9                         | -1.429          | 0.350       | 0.00598384       | 99.1           | -0.605          | 0.207       | 0.04246472       |
| <b>Ccny</b>    | 71.1                          | -1.274          | 0.379       | 0.02959143       | 74.7           | -1.034          | 0.258       | 0.00181454       |
| <b>Gaint13</b> | 361.3                         | -1.244          | 0.341       | 0.0159734        | 504.9          | -0.371          | 0.113       | 0.01655375       |
| <b>Ablim1</b>  | 135.7                         | -1.172          | 0.296       | 0.00760665       | 158.7          | -0.798          | 0.151       | 1.1301E-05       |
| <b>Acsl3</b>   | 460.5                         | -1.075          | 0.309       | 0.0236877        | 703.9          | -1.467          | 0.153       | 3.0866E-18       |
| <b>Ube3a</b>   | 161.2                         | -1.027          | 0.303       | 0.02803579       | 209.5          | -0.688          | 0.187       | 0.00513769       |
| <b>Socs5</b>   | 358.6                         | -0.820          | 0.256       | 0.03984866       | 337.8          | -0.811          | 0.126       | 2.8137E-08       |
| <b>Heg1</b>    | 1328.6                        | -0.795          | 0.209       | 0.01057592       | 1062.7         | -0.378          | 0.067       | 1.6244E-06       |
| <b>Cand1</b>   | 323.4                         | -0.744          | 0.231       | 0.03864972       | 283.1          | -0.597          | 0.187       | 0.02106014       |
| <b>Gprasp1</b> | 509.6                         | -0.534          | 0.163       | 0.03426564       | 356.1          | -0.416          | 0.145       | 0.04690377       |

095  
096

097 **Extended Data Fig. 1: Figures related to Fig. 1.**

- 098 a. Schematics photoreceptor degeneration in RP mice. # *rd10* mid stage varies due to light-  
099 dependent rod degeneration (Chang et al., 2007).
- 100 b. AAV8-RO1.7-GFP.Txnip expression in P21 wt (BALB/c) and P16 *rd1* retina. (Green: GFP.  
101 Magenta: PNA for cone extracellular matrix. Gray: DAPI.) Abbreviations. OS: outer  
102 segment, IS: inner segment, ONL: outer nuclear layer, OPL: outer plexiform layer, INL:  
103 inner nuclear layer, RPE: retinal pigmented epithelium.
- 104 c. Pixels recognized as cones by a MATLAB automated-counting program zoomed in from the  
105 small boxes in the top four panels (Fig. 1a). (Gray: H2BGFP labeled cones. Magenta:  
106 center of one labeled cell recognized by MATLAP program.)
- 107 d. P36 wildtype (C57BL/6J) retinal cross-section with PNA staining injected with control or 2E9  
108 vg/eye RedO-Txnip, indicating RedO-Txnip is not toxic to the wildtype cones. 3E8 vg/eye  
109 RedO-H2BGFP was co-injected to track infection. (Magenta: PNA. Green: H2BGFP. Gray:  
110 DAPI.)
- 111 e. Quantification of H2BGFP-positive cones within the half radius of P20 *rd1* control retinas,  
112 and P50 *rd1* retinas treated with 20 different vectors and combinations or control. (Please  
113 note: we did not use dark-reared *rd10* for testing the RdCVF vector, and our AAV capsid  
114 and promoter were different from the original study (Byrne et al., 2015).

115 Error bar: standard deviation. NS: not significant,  $p > 0.05$ . \*  $p < 0.05$ . \*\*  $p < 0.01$ . \*\*\*  $p < 0.001$ .  
116 \*\*\*\*  $p < \text{or } \ll 0.0001$ . (Same applies to the rest of Extended Data Figures.)  
117

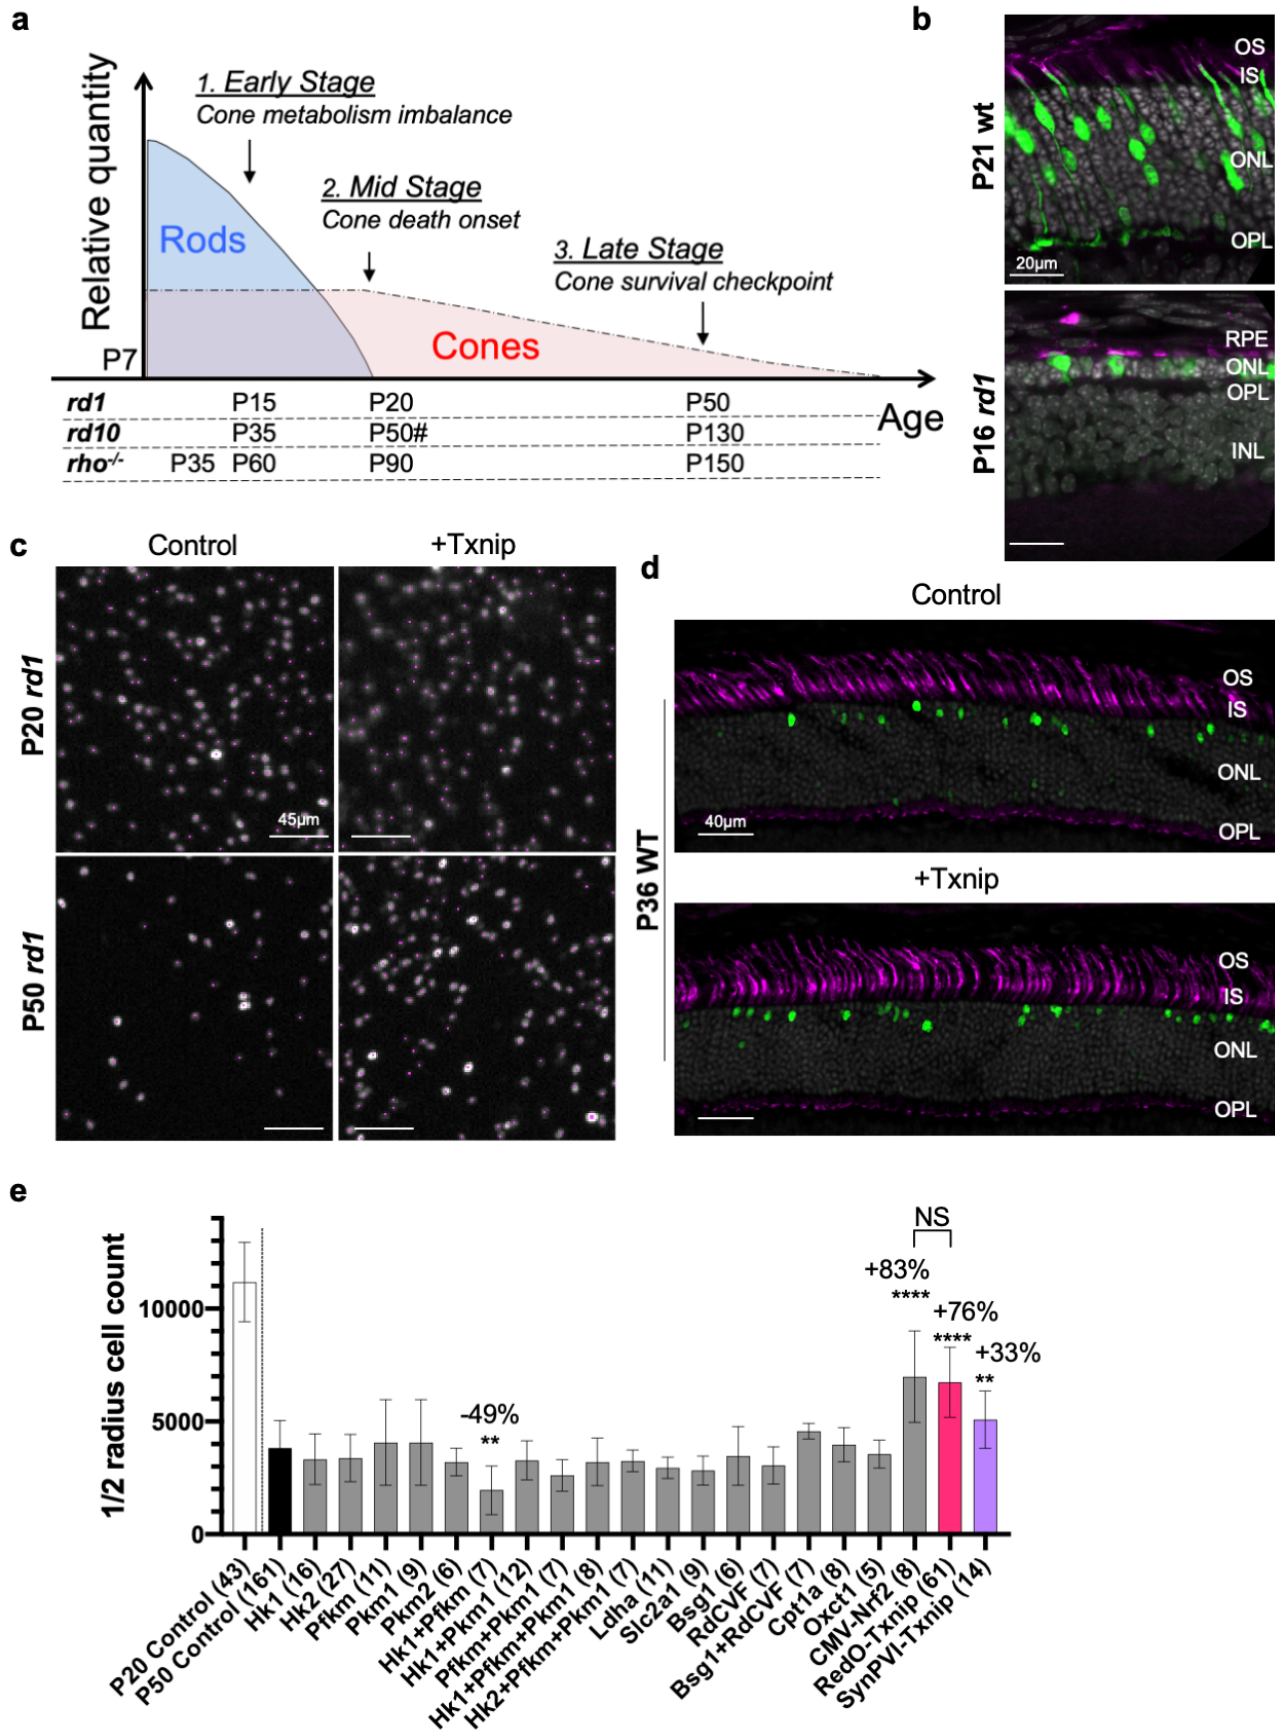



120 **Extended Data Fig. 2: Figures related to Fig. 2.**

- 121 a. Representative P130 *rd10* and P150 *rho*<sup>-/-</sup> flat-mounted retinas with H2BGFP (gray) labeled  
122 cones treated with Txnip.C247S or control.
- 123 b. Quantification of H2BGFP-positive cones within the half radius of P130 *rd10* and P150 *rho*<sup>-/-</sup>  
124 retinas treated with Txnip.C247S or control.
- 125 c. Quantification of H2BGFP-positive cones within the half radius of P20 *rd1* retinas treated  
126 with Txnip, Txnip.S308A or control.
- 127 d. Quantification of H2BGFP-positive cones within the half radius of P50 *rd1* retinas treated  
128 with siNC (non-targeting scrambled control shRNA) or Slc2a1/Glut1 shRNA.  
129

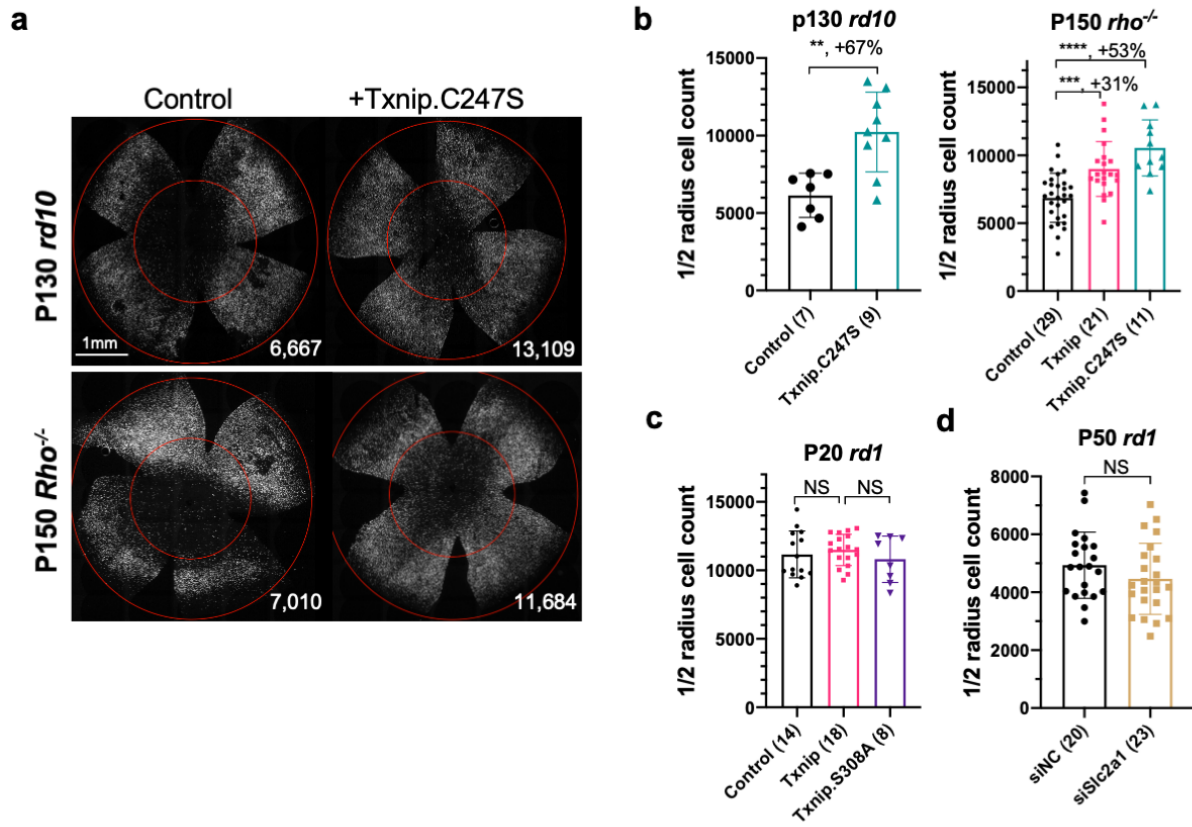

132 **Extended Data Fig. 3: Figures related to Fig. 3.**

- 133 a. AAV8-RO1.7-Ldhb-FLAG with siNC control or *Ldhb* shRNAs in P21 wildtype (CD1) retina  
134 plus RedO-H2BGFP to track the infection. (Magenta: anti-FLAG. Green: anti-GFP. Gray:  
135 DAPI.)
- 136 b. Representative P50 *rd1* flat-mounted retinas with H2BGFP (gray) labeled cones treated  
137 with Txnip + siNC, Txnip + siLdhb<sup>(#1)</sup>, or Txnip + siLdhb<sup>(#3)</sup>.
- 138 c. Quantification of H2BGFP-positive cones within the half radius of P50 *rd1* retinas treated  
139 with Txnip + siNC, Txnip + siLdhb<sup>(#1)</sup> or Txnip + siLdhb<sup>(#3)</sup>.
- 140 d. Representative P50 *rd1* flat-mounted retinas with H2BGFP (gray) labeled cones treated  
141 with Txnip or Txnip + Ldha.
- 142 e. Quantification of H2BGFP-positive cones within the half radius of P50 *rd1* retinas treated  
143 with Txnip or Txnip + Ldha.  
144  
145

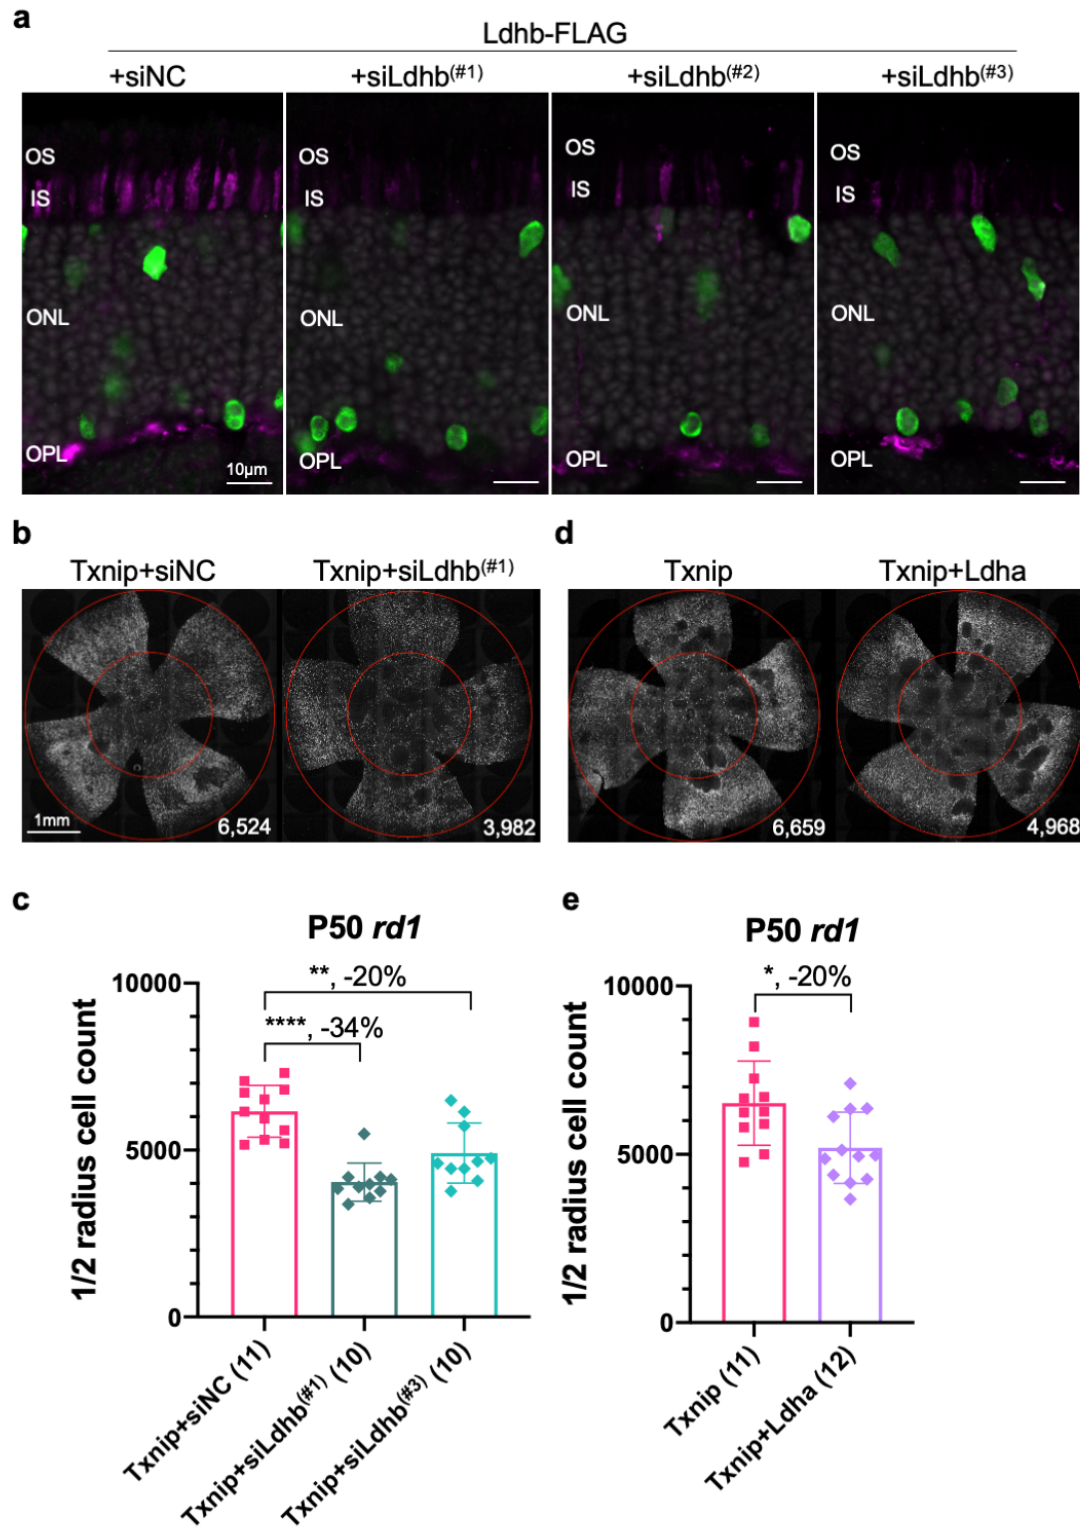



147 **Extended Data Fig. 4: Figures related to Fig. 4.**

- 148 a. Representative *ex vivo* live images of iGlucoSnFR labeled cones in P20 *rd1* retinas cultured  
149 with high-glucose medium treated Txnip or control. (Green: glucose sensing GFP. Magenta:  
150 mRuby for self-normalization.)
- 151 b. Quantification of normalized iGlucoSnFR fluorescence intensity ( $F_{\text{iGlucoSnFR}}^{\text{GFP}} : \text{mRuby}$ ,  
152 proportional to glucose level) in cones from P20 *rd1* retinas treated with Txnip or control ( $\approx 3$   
153 images per retina).
- 154 c. *ex vivo* live images of pHRed labeled cones in P20 *rd1* retinas cultured with high-glucose  
155 medium treated Txnip or control. (Magenta: fluorescence by 561 nm excitation, indicating a  
156 lower pH. Green: fluorescence by 458 nm excitation, indicating a higher pH.)
- 157 d. Quantification of normalized pHRed fluorescence intensity ( $F_{\text{pHRedx}}^{561\text{nm} : 458\text{nm}}$ , inversely  
158 proportional to pH value) in cones from P20 *rd1* retinas treated with Txnip or control ( $\approx 3$   
159 images per retina).  
160

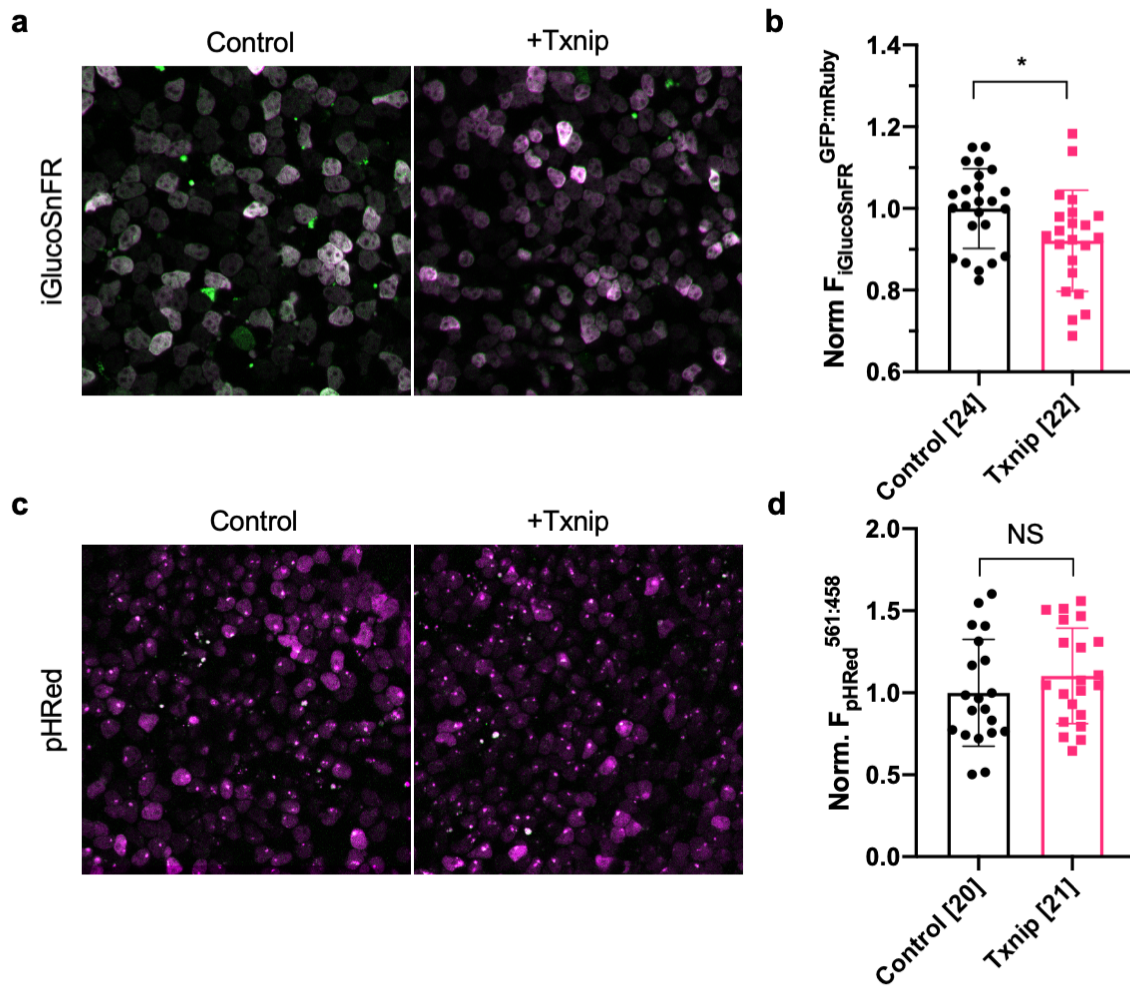

162 **Extended Data Fig. 5: Figures related to Fig. 5.**

- 163 a. Volcano plots of differentially expressed genes in RP cones FACS sorted from P21 *rd1*  
164 retinas (left panel; +Txnip, n = 3, relative to control, n = 6) and P90 *rho*<sup>-/-</sup> retinas (right panel;  
165 +Txnip, n = 4, relative to control, n = 4). Dotted lines indicate adjusted  $p < 0.05$  and log<sub>2</sub>  
166 fold change > 0.5.
- 167 b. ddPCR fold-changes of commonly upregulated mitochondrial ETC genes and genes not  
168 confirmed (i.e. *Acs/3* and *Ft/1*) by Txnip overexpression in FACS sorted P21 *rd1* cones.
- 169 c. First panel: AAV8-SynP136-mitoRFP expression in P26 wildtype (BALB/c) retina cross-  
170 section. (Magenta: mitoRFP. Green: PNA. Gray: DAPI.) Other three panels: representative  
171 mitoRFP images from the control, Txnip and Txnip.S308A of fixed P20 *rd1* retina flat-  
172 mounts near optic nerve head, reflecting the mitochondrial function. (Magenta: mitoRFP.  
173 Gray: H2BGFP, for infection normalization.)
- 174 d. Quantification of normalized mito-RFP:H2BGFP intensity of P20 *parp1* retinas treated with  
175 control, Txnip or Txnip.S308A (4 images per retina).
- 176 e. Representative JC-1 dye staining image from live cones in P20 *rd1* retina treated with Txnip  
177 + siNC or + siLdhd<sup>(#2)</sup>. (Magenta: J-aggregate, indicating high ETC function. Green: JC-1  
178 monomer, for self-normalization. H2BGFP channel, the tracer of AAV infected area, is not  
179 shown.)
- 180 f. Quantification of normalized cone JC-1 dye staining (fluorescence intensity of J-  
181 aggregate:JC-1 monomer) from live cones in P20 *rd1* retinas treated with Txnip + siNC or  
182 siLdhd<sup>(#2)</sup> (4 images per retina).
- 183 g. Parp1 antibody staining of *parp1*<sup>+/+</sup> (C57BL/6J) or *parp1*<sup>-/-</sup> (on 129S background) retina.  
184 (Magenta: Parp1. Gray: DAPI. Arrow heads: Parp1 staining from inner segments and cone  
185 nuclei).
- 186 h. Representative mitochondria EM images from P20 *parp1*<sup>+/+</sup> or *parp1*<sup>-/-</sup> *rd1* cones.
- 187 i. Quantification of mitochondrial diameters from P20 *parp1*<sup>+/+</sup> or *parp1*<sup>-/-</sup> *rd1* cones from one  
188 retina per condition.
- 189  
190  
191

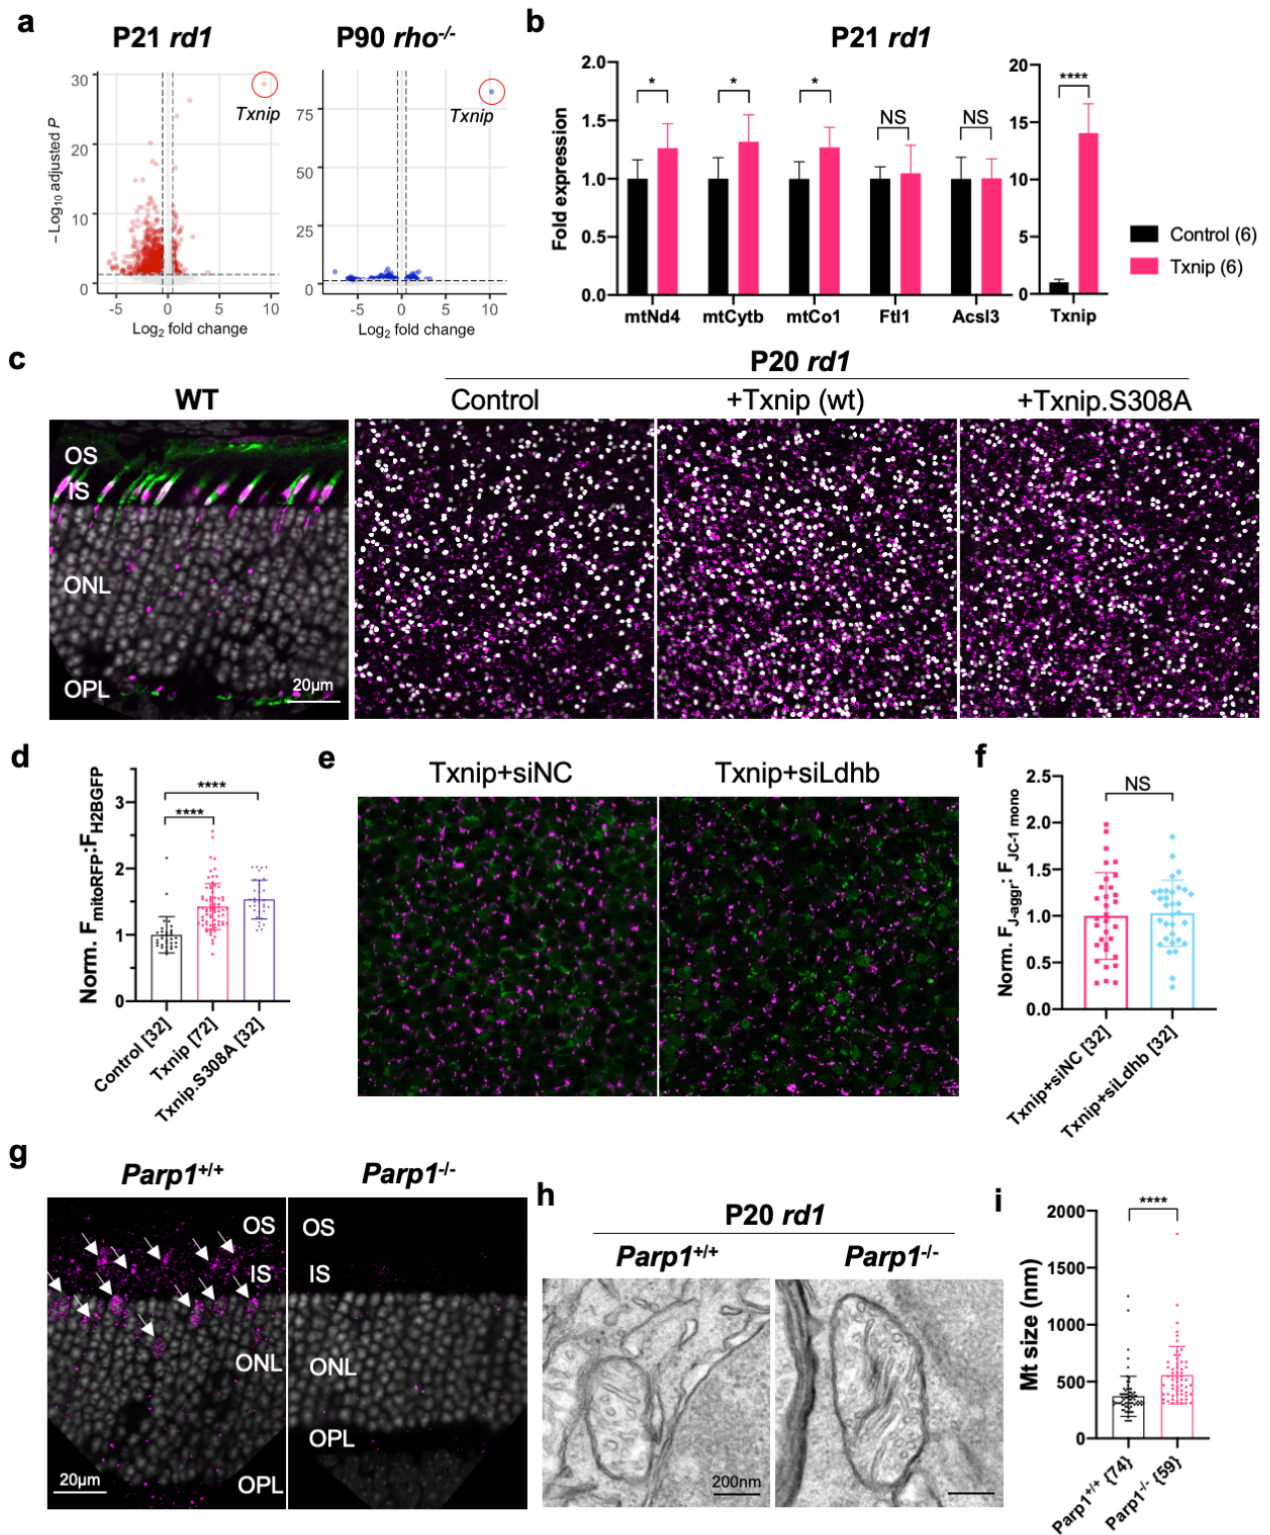



194 **Extended Data Fig. 6: Figures related to Fig. 7 and 8.**

- 195 a. Glut1 expression in P37 wildtype (C57BL/6J) eyes treated with control, AAV8-Best1-Txnip  
196 or AAV8-Best1-Txnip.C247S.LL351&352AA (Magenta: Glut1. Green: RedO-H2BGFP for  
197 infection tracing, leaky expression in RPE due to recombination with Best1-vector due to  
198 unclear mechanism(Wu et al., n.d.). Gray: DAPI.)
- 199 b. Quantification of H2BGFP-positive cones within the half radius of P50 *rd1* retinas treated  
200 with 6 different Best1-vectors or control. (Please note: we did not use dark-reared *rd10* for  
201 testing the RdCVF vector, and our AAV capsid and promoter were different from the original  
202 study (Byrne et al., 2015).)
- 203 c. Quantification of H2BGFP-positive cones within the half radius of P50 *rd1* retinas treated  
204 with Mpc1 + Mpc2 or control.
- 205 d. Representative P50 *rd1* flat-mounted retinas with H2BGFP (gray) labeled cones treated  
206 with Vegf164 and control. Abbreviation: Txnip.CS.LLAA = Txnip.C247S.LL351&352AA.
- 207 e. Quantification of H2BGFP-positive cones within the half radius of P50 *rd1* retinas treated  
208 with Vegf164 or control.
- 209 f. Quantification of H2BGFP-positive cones within the half radius of P50 *rd1* retinas treated  
210 with control, SynPVI-Hk2, SynPVI-Nrf2, RedO-Ldhb, RedO-Cx3cl1, RedO-Txnip and  
211 combinations with RedO-Txnip. Abbreviation: VI = SynPVI. RO- or R- = RedO-.
- 212
- 213

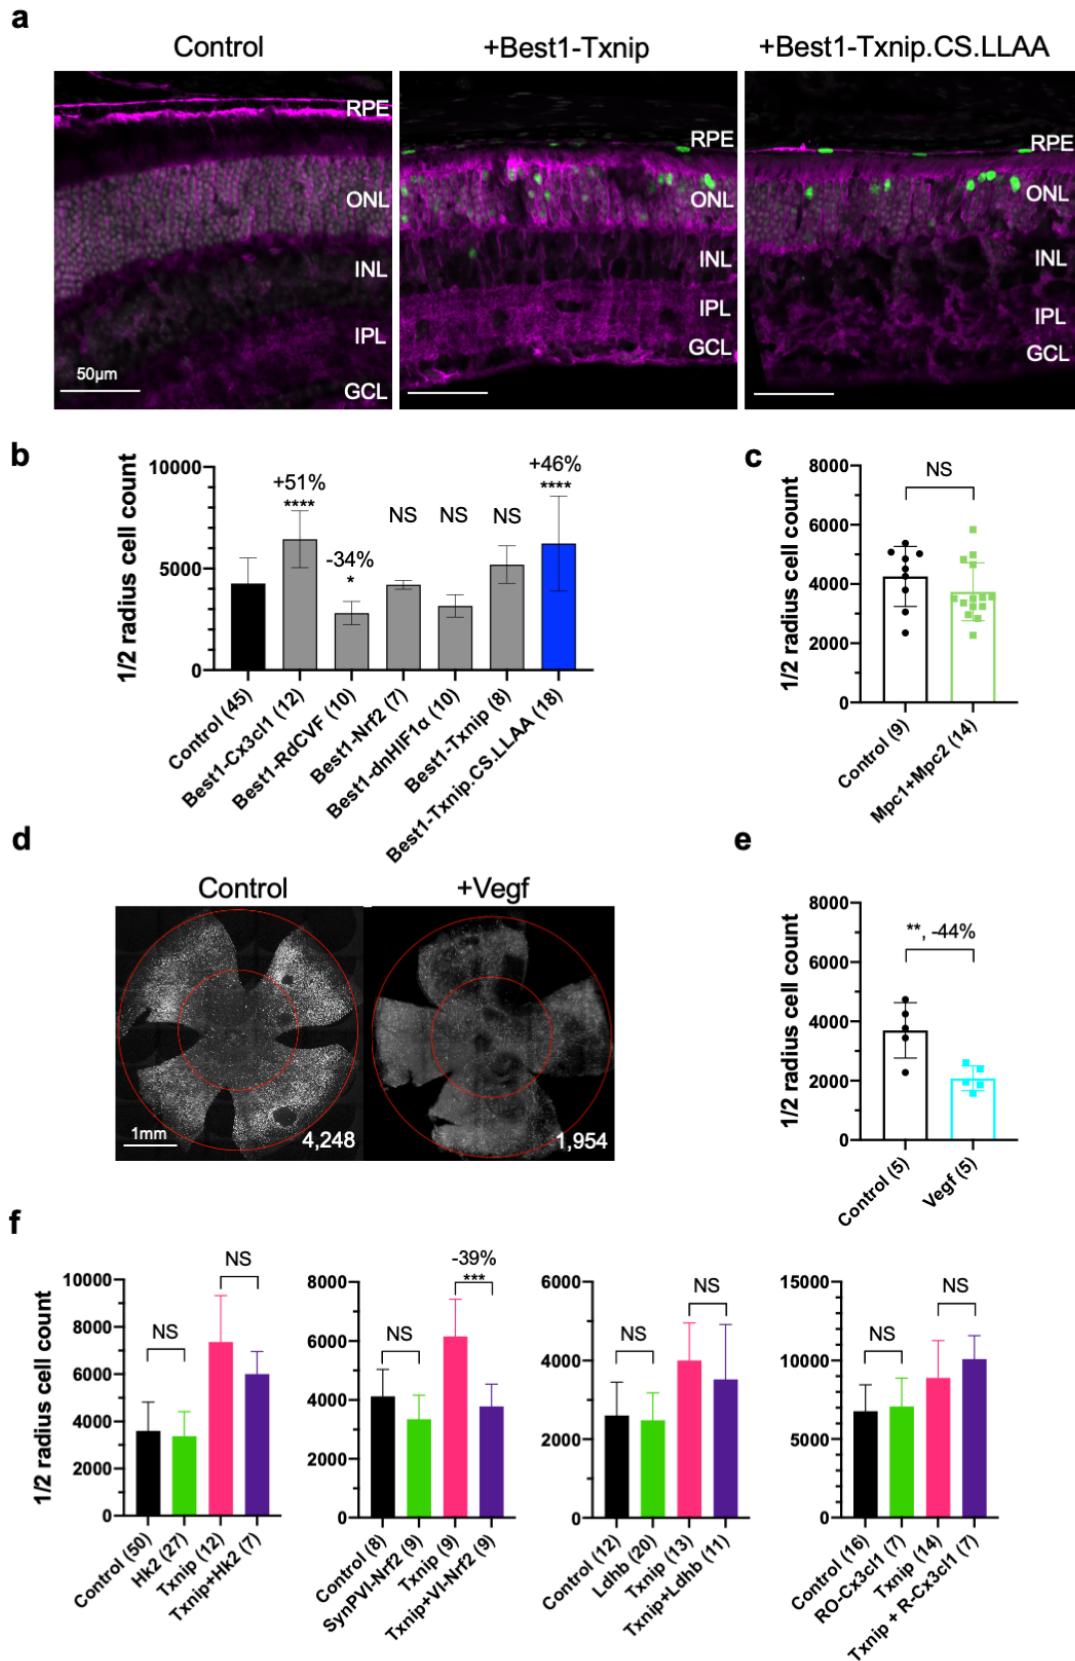

215  
216

## **Extended Data Fig. 7: Schematics of proposed Txnip working mechanism.**

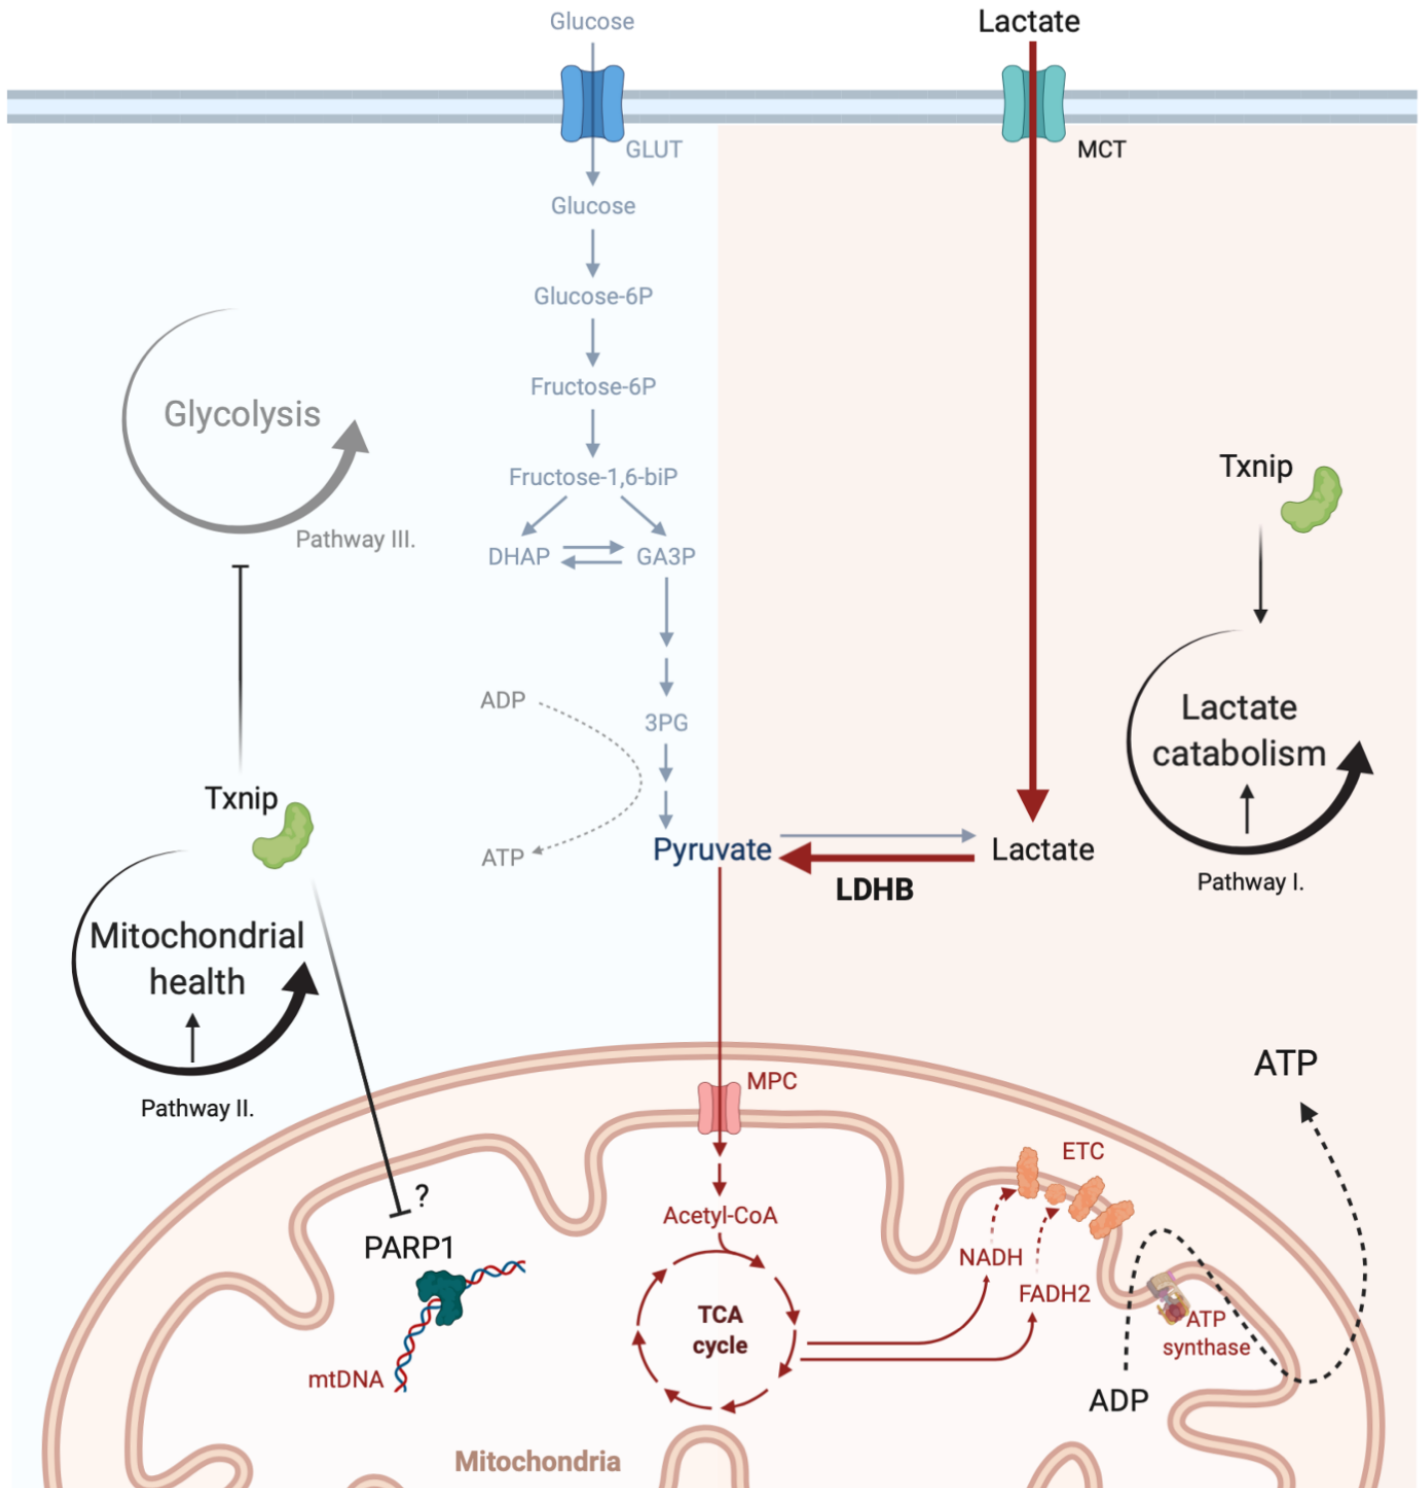

218 **Extended Data Fig. 8: Slc2a1/Glut1 shRNA *in vitro* screening and screened out siSlc2a1<sup>(#a)</sup>**  
219 **for *in vivo* experiments.**

- 220 a. GFP signals from overnight transfected HEK293T cells labeled with CAG-Slc2a1-IRES-  
221 GFPd2 (CIGd2-Glut1) or CIGd2-Chx10 (negative control group) plus siSlc2a1(#a, b, c, d) or  
222 siNC at 1:1 or 1:2 ratios.
- 223 b. mCherry signals (positive-control for transfection) from the same imaging regions as in sub-  
224 Fig. a above.

225  
226



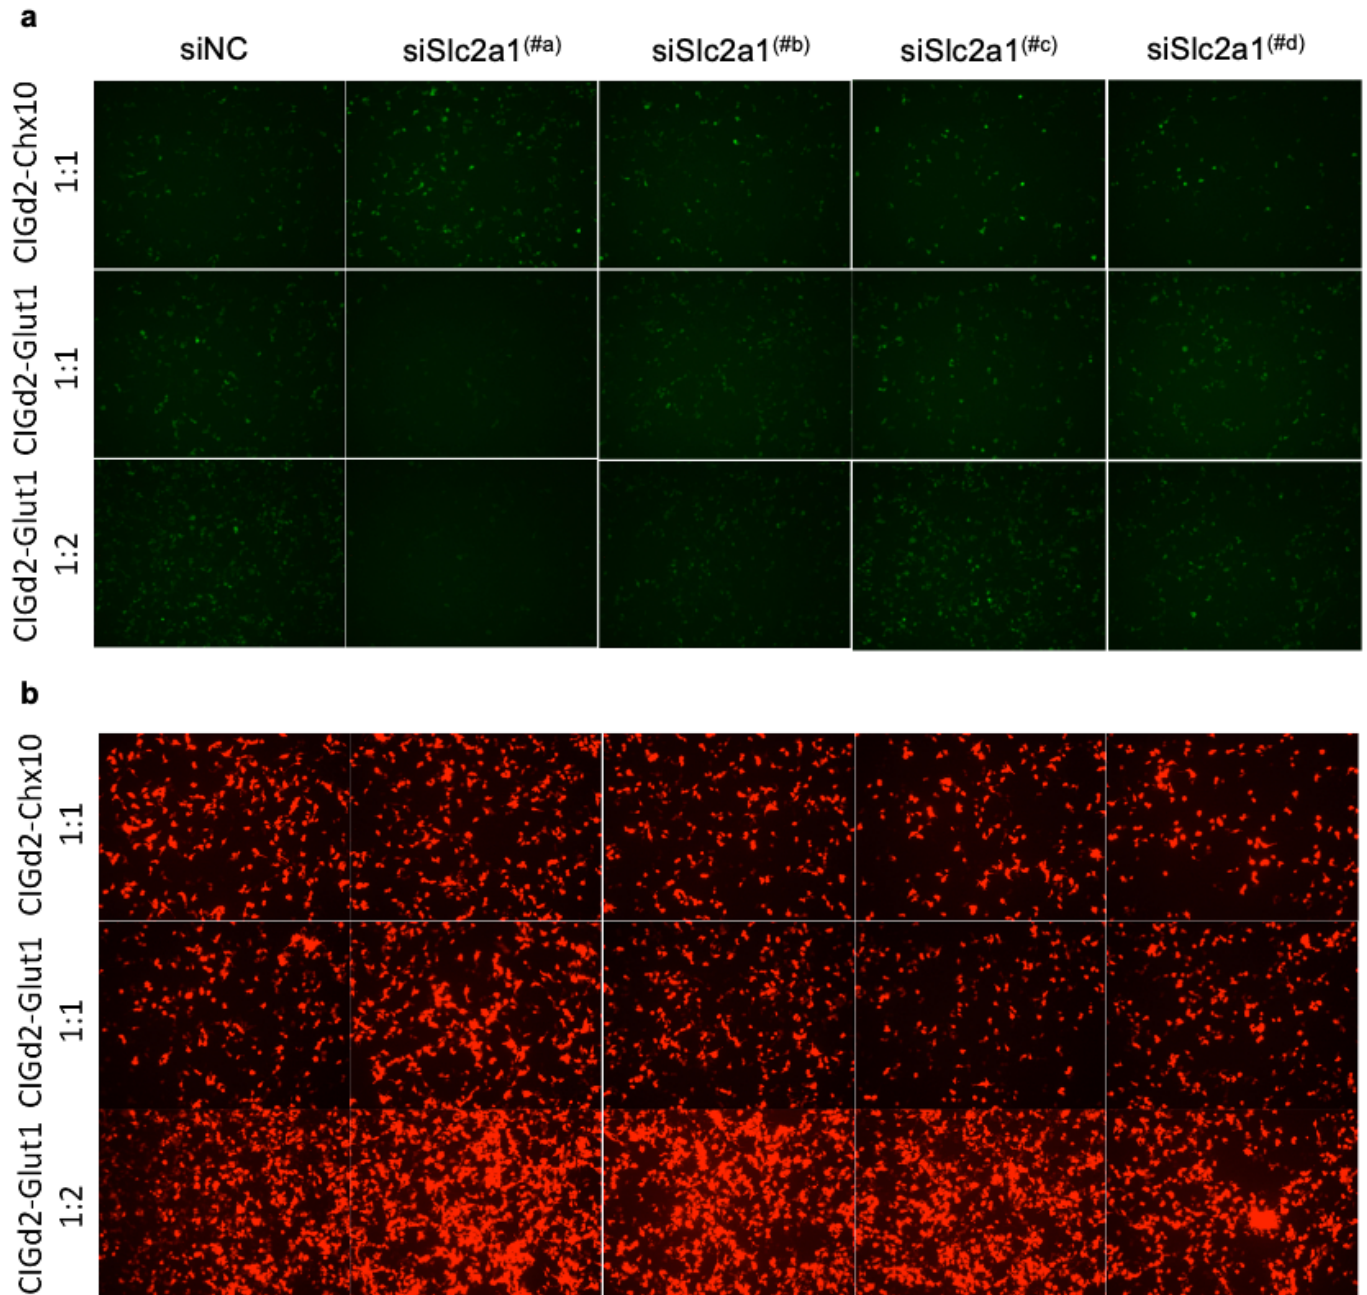

- 228 **Extended Data Fig. 9: Ldhb shRNA *in vitro* screening and screened out siLdhb<sup>(#2), (#1) & (#3) for</sup>**  
229 ***in vivo* experiments**
- 230 a. GFP signals from overnight transfected HEK293T cells labeled with CAG-Ldhb-IRES-  
231 GFPd2 (CIGd2-Ldhb) or CIGd2-Chx10 (negative control group) plus siLdhb(#1, 2, 3, 4) or  
232 siNC at 1:1 or 1:2 ratios.
  - 233 b. mCherry signals (positive-control for transfection) from the same imaging regions as in sub-  
234 Fig. a above.
- 235  
236  
237

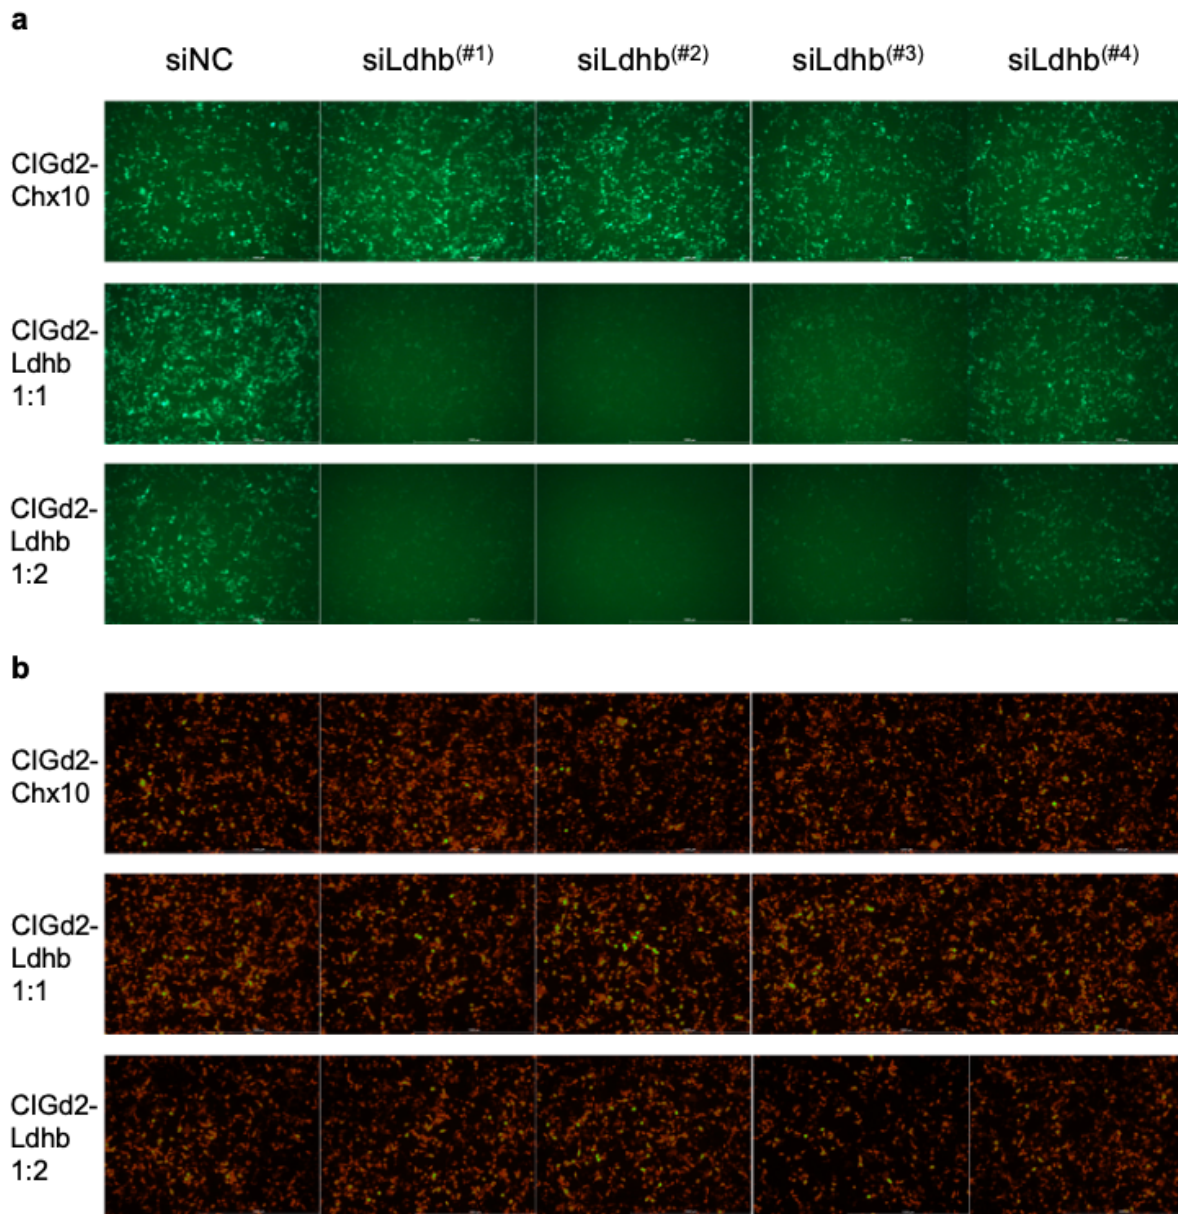

239 **Extended Data Fig. 10: Oxct1 shRNA *in vitro* screening and screened out siOxct1<sup>(#c)</sup> for *in***  
240 ***vivo* experiments**

- 241 a. GFP signals from overnight transfected HEK293T cells labeled with CAG-Oxct1-IRES-  
242 GFPd2 (CIGd2-OXCT1) or CIGd2-Chx10 (negative control group) plus siOxct1(#a, b, c) or  
243 siNC at 1:2 ratios.
- 244 b. mCherry signals (positive-control for transfection) from the same imaging regions as in sub-  
245 Fig. a above.
- 246
- 247
- 248



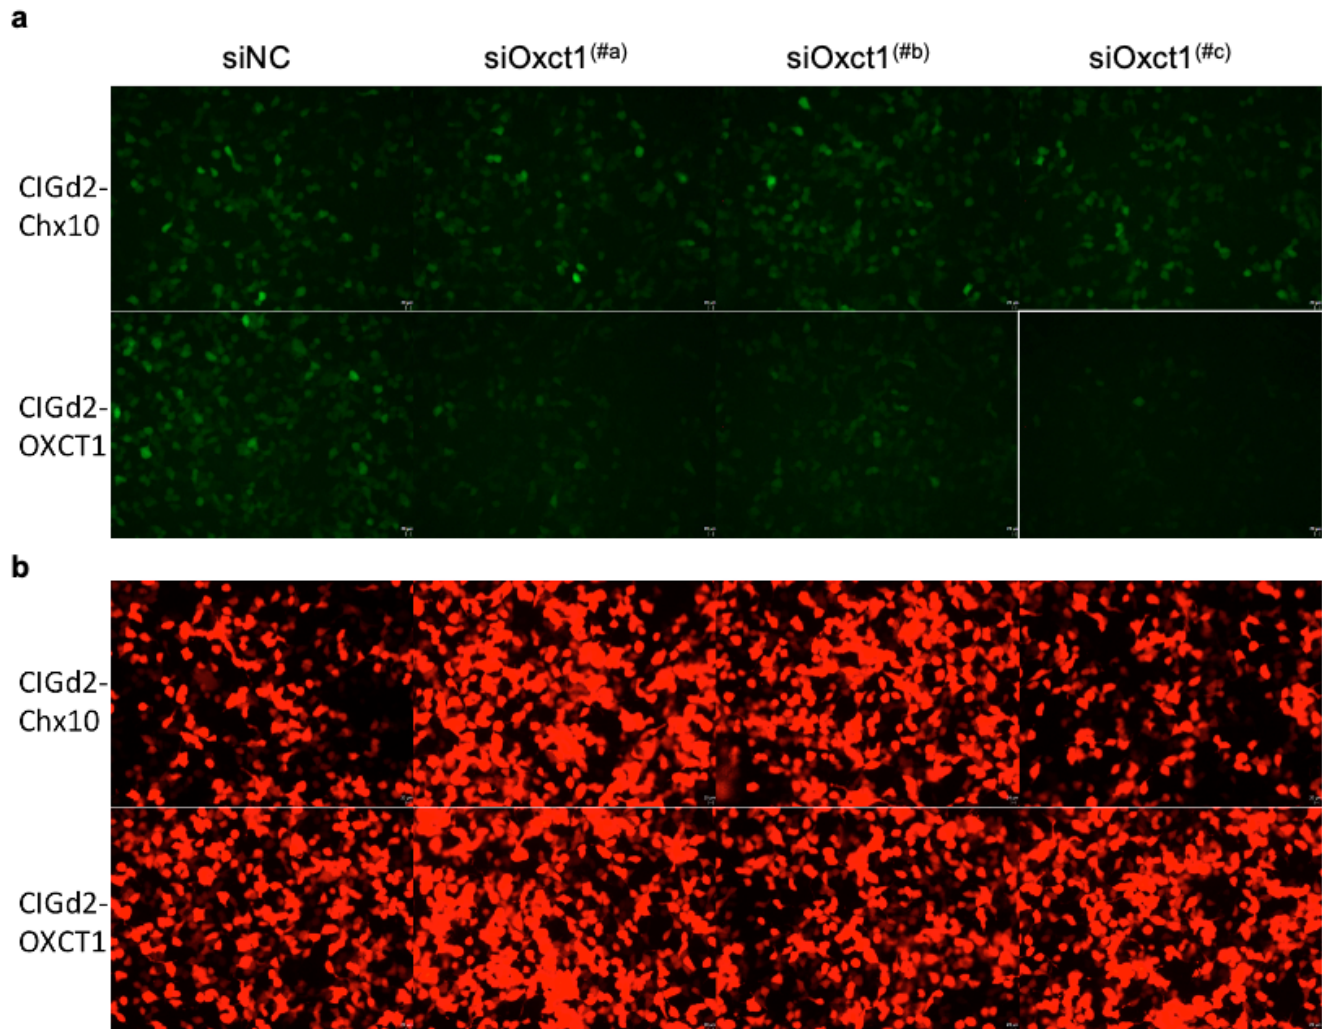



250 **Extended Data Fig. 11: Cpt1a shRNA *in vitro* screening and screened out siCpt1a<sup>(#c)</sup> for *in***  
251 ***vivo* experiments**

- 252 a. GFP signals from overnight transfected HEK293T cells labeled with CAG-Cpt1a-IRES-  
253 GFPd2 (CIGd2-CPT1A) or CIGd2-Chx10 (negative control group) plus siCpt1a(#a, b, c) or  
254 siNC at 1:2 ratios.
- 255 b. mCherry signals (positive-control for transfection) from the same imaging regions as in sub-  
256 Fig. a above.

257

258

259

260

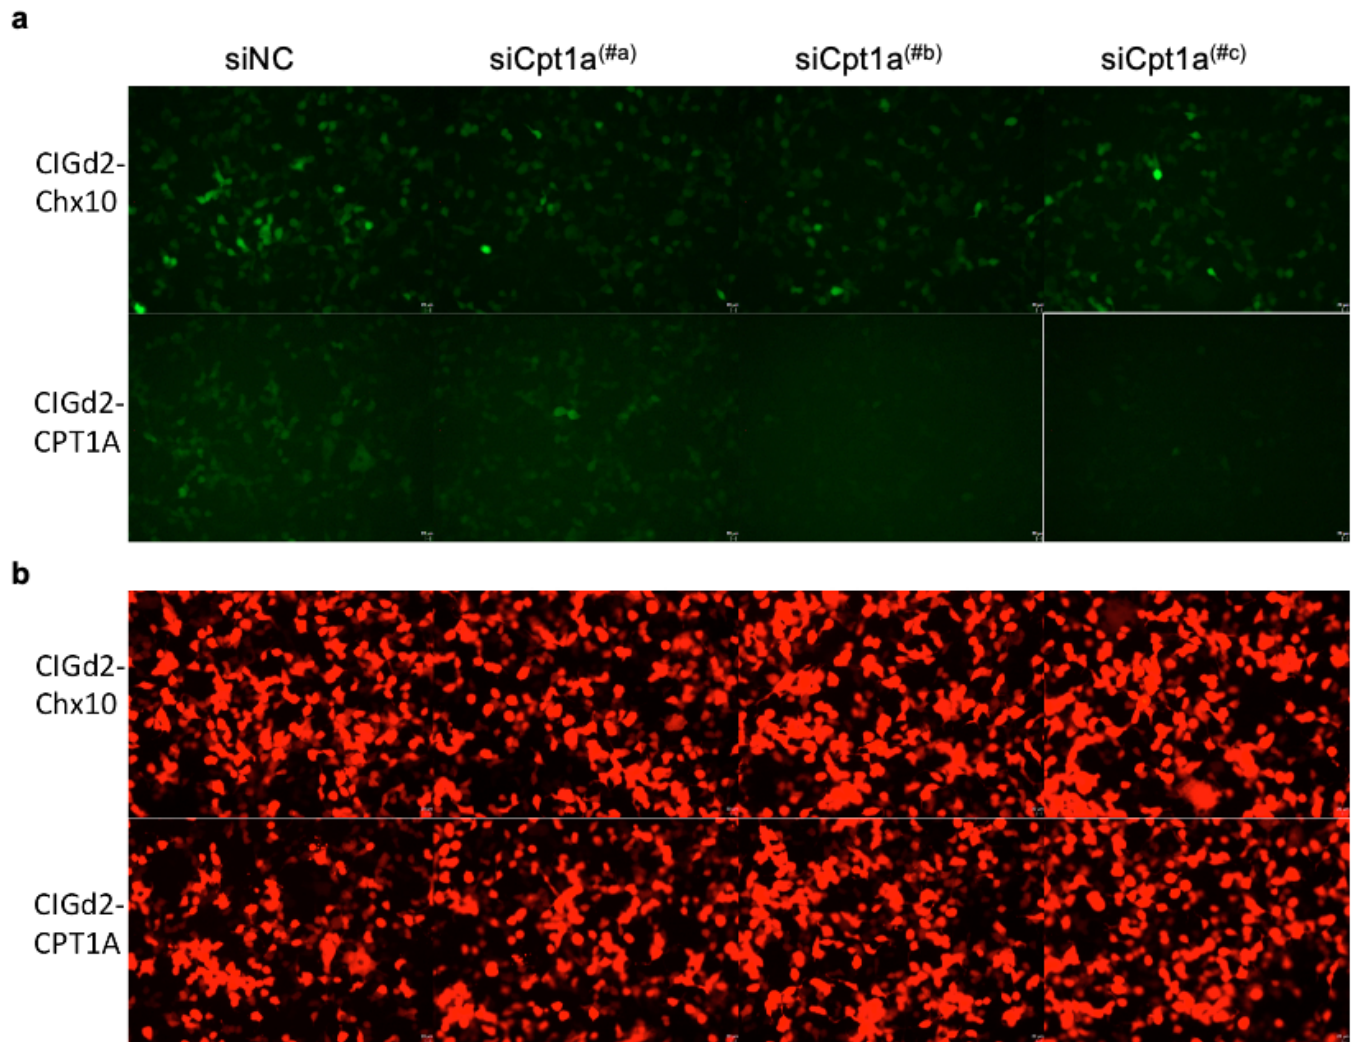

Source: https://www.biorxiv.org/content/10.1101/2021.01.27.428411v1.full.pdf
